# Supplementary material for: C9orf72 arginine-rich dipeptide repeat proteins disrupt karyopherin-mediated nuclear import
Source: eLife. 2020 Mar 2;9:e51685. doi: 10.7554/eLife.51685 (PMC7051184; doi:10.7554/eLife.51685)
Supplement: Figure 1—source data 1. [file elife-51685-fig1-data1.xlsx]

## Sheet: Figure 1B-F
Figure 1B. Rango spectral profile							Figure 1C. Increase in Rango FRET ratio				Figure 1D. Increase in Rango FRET ratio								Figure 1F. Relative Rango-bound ImpB
	Importin β + Rango		+ RanQ69L-GTP								nM DPRs	GR	PR	GA	GP	PA				GR			PR			GA			GP			PA
nm	1	2	1	2			nM RanQ69L-GTP	Increase in FRET ratio			0	0	0	0	0	0			nM DPRs	1	2	3	1	2	3	1	2	3	1	2	3	1	2	3
460	50.9	49.46	45.88	44.84			0	0			10	0.901649	1.65831						0	1	1	1	1	1	1	1	1	1	1	1	1	1	1	1
461	48.84	52.3	45.86	46.76			20	3.30176			20	1.84285	2.55422						50	0.837404	0.654012	0.704217	0.6112	0.376449	0.567658	1.1463	1.30058	1.1661	1.20512	0.900533	0.925224	0.864745	0.736957	1.08646
462	48.76	50.82	42.84	41.86			40	4.02275			40	2.59865	2.818						100	0.414417	0.429556	0.51557	0.73743	0.206763	0.463127	1.09747	1.14631	0.885154	1.18043	1.08452	1.06248	0.898128	0.669406	1.01642
463	48.22	50.12	43.44	45.74			80	3.4737			100	3.07052	3.21532	0.237669	0.311363	-0.039469			250	0.293688	0.244962	0.204841	0.443729	0.123221	0.221006	1.06689	1.12527	1.04571	1.33641	0.997261	1.13034	0.953197	0.59162	0.989173
464	50.48	50	44.08	42.24			120	3.66853			200	3.05853	3.48474						500	0.301855	0.212621	0.111253	0.316041	0.057387	0.025396	1.6814	1.0872	0.907864	1.10776	0.585182	0.88408	0.654281	0.531001	0.958626
465	51.38	51.52	41.98	42.52			160	3.62182			500	3.06345	2.9484	0.480001	0.47441	0.771259			1000	0.178779	0.193195	0.041618	0.245079	0.077169	0.003953	1.26646	1.21002	0.986711	0.539384	0.626298	0.983835	0.732981	0.35173	0.9383
466	49.8	52.86	43.64	41.2			200	4.19078			1000			0.336147	0.491649	0.311784
467	55.4	53.5	42.5	39.26							2000			0.228735	0.720787	0.279309
468	55.28	54.5	41.04	41.56
469	57.5	52.02	43.62	44
470	55.38	56.42	41	41.86
471	60.02	59.08	43.48	43.06
472	63.58	57.6	45.02	40.06
473	64.28	58.36	43.06	43.84
474	63	59.7	44.88	40.98
475	67.06	62.66	44.96	43.32
476	72.58	64.84	44.78	46.16
477	73.02	65.06	49.26	45.62
478	74.46	68.92	51.54	44.64
479	78.52	69.8	48.46	47.44
480	77.5	66.6	50.72	48.22
481	76.96	67.68	51.88	46.38
482	77.16	68.42	51.08	47.24
483	80.44	70.3	48.52	47.02
484	84.06	70.02	48.94	45.96
485	78.68	70.84	48.5	44.94
486	77.4	70.94	47.48	42.94
487	79	66.08	45.68	44.16
488	77.66	69.02	47.32	44.74
489	78.88	66.94	48.14	46.18
490	77.86	67.16	46.08	43.5
491	73.16	64.98	46.82	43.28
492	75.24	64.4	46.08	43.2
493	69.98	61.38	42.78	43.32
494	73.92	63.64	42.56	41.66
495	70.2	62.96	41.26	41.42
496	68	62.74	42.12	39.42
497	69.88	60.28	41.76	38.18
498	69.86	59.52	40.56	38.58
499	67.64	59.68	42.78	39.36
500	63.46	56.72	39.52	35.26
501	66.14	58.9	40.26	37.36
502	65.1	55.54	40.54	36.02
503	66.74	56.54	39.7	36.5
504	66.88	56.84	39.46	40.1
505	65.24	57.46	40.54	38.22
506	63.44	54.86	41.92	35.86
507	63.5	57.48	39.14	35.42
508	62.46	56.04	40.1	37.46
509	64.84	53.18	39.84	37.14
510	64.6	53.78	39.38	39.94
511	62.96	56.06	41.06	38.82
512	61.44	56.24	42.86	41.88
513	63.48	54.98	46.6	43.34
514	64.36	56.94	44.96	46.86
515	65.38	60.44	51.28	48.2
516	67	61.72	53.42	51.6
517	69.24	63.44	57.86	55.88
518	74.04	67.24	65.38	58.32
519	70.36	70.66	70.42	65.02
520	75.72	73.08	75.62	71.52
521	82.98	77.22	81.5	81.66
522	88.1	84.38	97.4	92
523	93.2	90.72	109.9	101.28
524	96.84	100.42	118.58	117.72
525	107.3	107.96	134.14	127.18
526	113.96	112.74	155.72	145.58
527	120.22	126.72	169.96	163.9
528	129.02	135.18	185.26	173.02
529	135.28	144.46	202.2	197.36
530	146.76	152	228.5	207.98
531	146.06	165.66	233.7	220.76
532	159.56	169.78	245.32	241.28
533	165.44	179.64	263.32	248.96
534	167.86	181.7	269.08	259.5
535	174.9	183.2	274.28	260.46
536	170.8	188.38	273.62	264.68
537	169.6	183.04	277.4	270.72
538	170.58	186.38	280.34	271.26
539	171.96	180.46	273.52	263.84
540	164.96	180.14	272.08	251.92
541	158.98	171.72	262.6	256.88
542	157.04	166.54	247.72	244.22
543	149.94	159.4	238.24	235.52
544	143.62	154.82	225.9	225.14
545	134.42	148.54	219.74	215.68
546	129.58	136.96	210.76	200.04
547	122.78	137.28	200.82	189.58
548	117.3	128.14	191.52	185.32
549	113.88	121.36	180.06	177.66
550	105.5	117.22	173.48	169

## Sheet: Figure 1I-K
Data
Figure 1I. Normalized N/C ratio for Rango import (timecourse) - note Il and IJ were run on the same plates and separated for clarity, control values are identical
time (minutes)		0	5	10	15	20	25	30
Untr	plate 1	0.057065	0.312069	0.574568	0.774721	0.865514	0.902393	1
	2	0.0416929	0.288664	0.663613	0.842609	0.826063	0.89252	1
	3	0.064255	0.422893	0.524116	0.65593	0.769078	0.861744	1
	4	0.0178452	0.206494	0.465584	0.667516	0.797129	0.889038	1
IPZ	plate 1	0.0132868	0.0878971	0.137893	0.162082	0.178179	0.185333	0.166425
	2	0.00358266	0.0880624	0.143443	0.170655	0.180227	0.194312	0.199097
	3	0.0204823	0.266854	0.161876	0.200694	0.218533	0.277337	0.305088
	4	0.0173085	0.0602442	0.0937877	0.158594	0.193345	0.247551	0.291292
GR 12.5 µM	plate 1	0.148965	0.33515	0.304829	0.551571	0.630355	0.56324	0.858615
	2	0.0704089	0.422535	0.739778	0.924791	1.02174	1.03391	1.01873
	3	0.0687149	0.440373	0.513214	0.563925	0.606046	0.757681	0.816485
	4	0.0295183	0.173621	0.369113	0.578291	0.698511	0.818328	0.999329
GR 25	plate 1	0.139852	0.349118	0.53079	0.668768	0.731369	0.764415	0.739375
	2	0.120183	0.517982	0.763845	0.881034	0.944893	1.00014	1.01627
	3	0.135613	0.524086	0.560621	0.661051	0.676743	0.68781	0.924678
	4	0.0886891	0.299879	0.396753	0.480343	0.567959	0.616664	0.481819
GR 50	plate 1	0.218721	0.51597	0.842177	0.954433	1.07504	1.12725	1.19845
	2	0.165445	0.424039	0.483386	0.607548	0.662656	0.693286	0.751812
	3	0.149818	0.537557	0.566072	0.717212	0.991245	1.14866	1.19343
	4	0.0746008	0.262981	0.558567	0.703341	0.829599	0.934791	0.968872
GR 100	plate 1	0.113363	0.245465	0.325356	0.394515	0.399029	0.43676	0.462482
	2	0.0612471	0.154793	0.208123	0.200602	0.211951	0.221523	0.218378
	3	0.0690453	0.312399	0.184176	0.233234	0.21589	0.324579	0.295342
	4	0.0583658	0.207031	0.29089	0.341607	0.354622	0.396619	0.383604
Figure 1J. Normalized N/C ratio for Rango import (timecourse)
time (minutes)		0	5	10	15	20	25	30
Untr	plate 1	0.057065	0.312069	0.574568	0.774721	0.865514	0.902393	1
	2	0.0416929	0.288664	0.663613	0.842609	0.826063	0.89252	1
	3	0.064255	0.422893	0.524116	0.65593	0.769078	0.861744	1
	4	0.0178452	0.206494	0.465584	0.667516	0.797129	0.889038	1
IPZ	plate 1	0.0132868	0.0878971	0.137893	0.162082	0.178179	0.185333	0.166425
	2	0.00358266	0.0880624	0.143443	0.170655	0.180227	0.194312	0.199097
	3	0.0204823	0.266854	0.161876	0.200694	0.218533	0.277337	0.305088
	4	0.0173085	0.0602442	0.0937877	0.158594	0.193345	0.247551	0.291292
PR 12.5 µM	plate 1	0.223746	0.209182	0.491611	0.519717	0.550805	0.527638	0.577208
	2	0.233406	0.524545	0.710926	0.860249	0.917681	0.996308	0.988377
	3	0.16518	0.488805	0.441361	0.549058	0.644533	0.697555	0.827056
	4	0.103314	0.228364	0.500201	0.633168	0.845968	0.869449	1.03421
PR 25	plate 1	0.251682	0.440167	0.476195	0.517588	0.587769	0.669875	0.702666
	2	0.196896	0.531656	0.678791	0.753726	0.806372	0.830439	0.834678
	3	0.11959	0.434119	0.382887	0.563429	0.331682	0.457879	1.00314
	4	0.142895	0.282973	0.516168	0.805582	0.669529	0.726151	0.768818
PR 50	plate 1	0.123925	0.259688	0.340431	0.376118	0.41453	0.461034	0.530534
	2	0.165445	0.424039	0.483386	0.607548	0.662656	0.693286	0.751812
	3	0.158573	0.460099	0.423356	0.491411	0.585563	0.634126	0.693426
	4	0.133503	0.352878	0.529451	0.617201	0.645646	0.68241	0.743996
PR 100	plate 1	0.0721404	0.16106	0.244783	0.288732	0.313261	0.308066	0.309854
	2	0.0478463	0.14946	0.203337	0.22207	0.224395	0.206755	0.196089
	3	0.0645854	0.311437	0.183515	0.277337	0.291873	0.308556	0.323092
	4	0.0527304	0.144774	0.165705	0.243392	0.292768	0.273179	0.30699
Figure 1K. Normalized N/C ratio for Rango import (2 hours/steady state)
Replicates	Untreated	Importazole		GR 12.5 µM	GR 25	GR 50	GR 100		PR 12.5	PR 25	PR 50	PR 100		GP 100	GA 100	PA 100
plate 1	0.999835	0.242704		1.11113	0.99324	0.612448	0.250948		0.838252	0.853092	0.457791	0.163809		1.25622	0.857214	0.948722
2	1	0.225899		1.10526	0.789995	0.894216	0.329911		1.35748	0.540386	0.581032	0.260448		0.940594	0.699844	0.630537
3	1	0.257015		1.07677	0.89945	0.975542	0.339629		0.635165	0.57402	0.433046	0.456825		0.705822	0.824716	0.762892
4	1	0.256182		0.678791	0.555803	0.778883	0.598325		0.868507	0.658511	0.589167	0.153016		0.597671	0.493654	0.568887
5	1	0.0965768		1.06187	0.556123	0.800928	0.555451		0.827157	0.747125	0.696684	0.34508		0.942162	0.53662	0.579662
6	1	0.364046		0.862293	0.871057	0.708312	0.470038		1.22033	0.636121	0.624854	0.350275		1.10683	0.843933	0.882741
7	1	0.289046		0.82225	0.727511	0.90526	0.456826		1.00316	0.781648	0.555175	0.435171		0.978345	0.928269	0.924659
Statistical analysis
Figure 1K
One-way ANOVA
F (12, 78) = 19.04	P<0.0001
Dunnett's multiple comparisons test
		Adjusted P	Summary
Untr vs. IPZ		<0.0001	****
Untr vs. GR 12.5		0.9993	ns
Untr vs. GR 25		0.0511	ns
Untr vs. GR 50		0.1622	ns
Untr vs. GR 100		<0.0001	****
Untr vs. PR 12.5		0.9994	ns
Untr vs. PR 25		0.0022	**
Untr vs. PR 50		<0.0001	****
Untr vs. PR 100		<0.0001	****
Untr vs. GP 100		0.9866	ns
Untr vs. GA 100		0.019	*
Untr vs. PA 100		0.0333	*

## Sheet: Figure 1L,supplemental figures
Data
Figure 1 - supplemental figure 1 C: normalized Rango N/C ratio
	Untr				IPZ				100µM GP10				100µM GA10				100µM PA10
Replicates	plate 1	2	3	4	1	2	3	4	1	2	3	4	1	2	3	4	1	2	3	4
0:00:00 min	5.7	4.2	6.4	1.8	1.3	0.4	2	1.7	7.6	4.7	7.4	2.8	7	5.3	11.2	5.7	12	3.8	14.9	5.1
0:05:00 min	31.2	28.9	42.3	20.6	8.8	8.8	26.7	6	24.9	42.9	43.1	26.9	23.1	44.6	45.7	40.7	38.5	46.2	54.2	29.5
0:10:00 min	57.5	66.4	52.4	46.6	13.8	14.3	16.2	9.4	44.2	84.1	44.2	49.7	33.8	77.8	44.9	79.5	54	77.4	57.5	55.1
0:15:00 min	77.5	84.3	65.6	66.8	16.2	17.1	20.1	15.9	61.5	100.1	51.2	94.7	44.7	99.5	65.2	102	65.9	89.6	70	70.6
0:20:00 min	86.6	82.6	76.9	79.7	17.8	18	21.9	19.3	56	116.5	72.1	116.6	51	110.8	74.9	104.9	71.9	99.3	79.1	97.7
0:25:00 min	90.2	89.3	86.2	88.9	18.5	19.4	27.7	24.8	58.8	122.9	77.4	136.1	55.5	118.6	81.4	122.4	78.2	97.5	88.6	92
0:30:00 min	100	100	100	100	16.6	19.9	30.5	29.1	54.3	122.8	92.1	122.1	60.6	118.2	85.2	133.4	80.1	110.8	110.2	93.7
Figure 1 - supplemental figure 2 C,D: normalized Rango N/C ratio
B. 10-mers
Replicates	Untreated	Importazole		GR 12.5 µM	GR 25	GR 50	GR 100		PR 12.5	PR 25	PR 50	PR 100		GP 100	GA 100	PA 100
plate 1	100	33.8		100.3	94.5	65.6	21.8		68.6	49.1	28.1	22.5		84.5	78.8	86.9
2	100	24.8		121.2	129.8	71.7	21.6		80.1	61.3	35.8	17		141.4	116.7	95
3	100	35.5		124.4	84.8	73.3	26		88.3	65.9	44.8	31.7		103.3	106.4	105.6
C. 20-mers
Replicates	Untreated	Importazole		GR 1.25 µM	GR 2.5	GR 5	GR 10	GR 20		PR 1.25	PR 2.5	PR 5	PR 10	PR 20
plate 1	100	50.6		117.9	113.4	62.1	121.6	80		83.2	82.1	58.9	67.9	32
2	100	45.5		117.8	105.8	119.3	123.4	109		98.9	105.3	110.5	95.5	90.8
3	100	74.7		91.4	106.6	104.2	109.8	117.8		90.5	94.5	91.2	95.7	87.3
4	100	56.2		103.9	100.7	96.2	104.6	97.3		102.5	100.9	99.1	107.7	63.5
5	100	54.2		95.1	110.8	115.8	128.5	120.7		113.4	120.9	126.3	97.7	69.2
6	100									103.1	119.8	125	117	61.3
Figure 1 - supplemental figure 2 E,F: normalized NLS-GFP N/C ratio
E. 10-mers
Replicates	Untreated	Importazole		GR 6.125 µM	GR 12.5	GR 25	GR 50		PR 6.125	PR 12.5	PR 25	PR 50		GP 100	GA 100	PA 100
plate 1	100	69		98	90	96	69		80	65	53	54		111	112	105
2	100	35		98.9	92	87.8	77.2		72.8	59.8	40.7	23.4		108.7	104.1	122.8
3	100	49		103	90	99	72		92	59	52	53		103	116	112
4	100	45.1		93.7	91.4	97.5	59.2		67	67.5	43	32.2		111	113.7	113.6
F. 20-mers
Replicates	Untreated	Importazole		GR 1.25 µM	GR 2.5	GR 5	GR 10	GR 20		PR 1.25	PR 2.5	PR 5	PR 10	PR 20
plate 1	100	77.6		87.9	85.3	61.6	65.5	35.4		77.5	57.8	44.9	30.4	26.6
2	100	98		119.9	112.7	95	84.1	52		101.4	84.5	69.9	42.7	28.4
3	100	91		101.5	99.5	97	80.1	49.6		109.3	83	65.7	41.2	27.5
Figure 1 - supplemental figure 2 H,I: normalized M9 N/C ratio
H. 10-mers
Replicates	Untreated	Importazole		GR 25 µM	GR 50	GR 100		PR 25	PR 50	PR 100		GP 100	GA 100	PA 100
plate 1	100	11.8		112.8	105.8	59.1		78.2	64.9	60.1		68	89.5	90.8
2	100	-3.3		83.7	72.8	35.3		97.4	56.6	12.4		118	98.1	82.7
3	100	18.5		96.4	90.9	39.1		48.9	46.1	33.4
4	100	8.5
I. 20-mers
Replicates	Untreated	Importazole		GR 1.25 µM	GR 2.5	GR 5	GR 10	GR 20		PR 1.25	PR 2.5	PR 5	PR 10	PR 20
plate 1	100	19.2		109	92.9	98.5	94.1	66.4		107.4	99.4	88.5	74.4	43.8
2	100	35.9		97	94.2	92.2	88.6	62.2		85.3	84.3	77.5	57	39
3	100	18.5		99.4	100.7	102.4	89.7	57.9		85.5	89.4	83.2	61.7	39.8
4	100	8.5
Statistical analysis
B. Rango 10-mers								C. Rango 20-mers
One-way ANOVA								One-way ANOVA
F (12, 26) = 19.37		P<0.0001						F (11, 53) = 6.319		P<0.0001
Dunnett's multiple comparisons test								Dunnett's multiple comparisons test
		Adjusted P	Summary							Adjusted P	Summary
Untr vs. IPZ		<0.0001	****					Untr vs. IPZ		0.0006	***
Untr vs. GR 12.5 µM		0.7387	ns					Untr vs. GR 1.25 µM		0.9992	ns
Untr vs. GR 25		0.9996	ns					Untr vs. GR 2.5		0.9896	ns
Untr vs. GR 50		0.093	ns					Untr vs. GR 5		>0.9999	ns
Untr vs. GR 100		<0.0001	****					Untr vs. GR 10		0.4339	ns
Untr vs. PR 12.5		0.3906	ns					Untr vs. GR 20		0.9993	ns
Untr vs. PR 25		0.0089	**					Untr vs. PR 1.25		0.9998	ns
Untr vs. PR 50		<0.0001	****					Untr vs. PR 2.5		0.9994	ns
Untr vs. PR 100		<0.0001	****					Untr vs. PR 5		0.9997	ns
Untr vs. GP 100		0.9746	ns					Untr vs. PR 10		0.9996	ns
Untr vs. GA 100		>0.9999	ns					Untr vs. PR 20		0.0109	*
Untr vs. PA 100		0.9995	ns
E. NLS-GFP 10-mers								F. NLS-GFP 20-mers
One-way ANOVA								One-way ANOVA
F (12, 40) = 44.36		P<0.0001						F (11, 24) = 13.14		P<0.0001
Dunnett's multiple comparisons test								Dunnett's multiple comparisons test
		Adjusted P	Summary							Adjusted P	Summary
Untr vs. IPZ		<0.0001	****					Untr vs. IPZ		0.8886	ns
Untr vs. GR 6.125 µM		0.9996	ns					Untr vs. GR 1.25 µM		0.9996	ns
Untr vs. GR 12.5		0.4946	ns					Untr vs. GR2.5		0.9999	ns
Untr vs. GR 25		0.9697	ns					Untr vs. GR5		0.6155	ns
Untr vs. GR 50		<0.0001	****					Untr vs. GR10		0.1862	ns
Untr vs. PR 6.125		0.0014	**					Untr vs. G20		0.0002	***
Untr vs. PR 12.5		<0.0001	****					Untr vs. PR1.25		0.9994	ns
Untr vs. PR 25		<0.0001	****					Untr vs. PR2.5		0.142	ns
Untr vs. PR 50		<0.0001	****					Untr vs. PR5		0.0054	**
Untr vs. GP 100		0.5952	ns					Untr vs. PR10		<0.0001	****
Untr vs. GA 100		0.2385	ns					Untr vs. PR20		<0.0001	****
Untr vs. PA 100		0.114	ns
H. NLS-GFP 10-mers								I. NLS-GFP 20-mers
One-way ANOVA								One-way ANOVA
F (10, 21) = 12.05		P<0.0001						F (11, 26) = 48.09		P<0.0001
Dunnett's multiple comparisons test								Dunnett's multiple comparisons test
		Adjusted P	Summary							Adjusted P	Summary
Untr vs. WGA		<0.0001	****					Untr vs. WGA		<0.0001	****
Untr vs. GR25 µM		0.9997	ns					Untr vs. GR1.25 µM		0.9996	ns
Untr vs. GR50		0.9787	ns					Untr vs. GR2.5		0.991	ns
Untr vs. GR100		0.0016	**					Untr vs. GR5		0.9994	ns
Untr vs. PR25		0.3079	ns					Untr vs. GR10		0.5173	ns
Untr vs. PR50		0.0135	*					Untr vs. G20		<0.0001	****
Untr vs. PR100		0.0003	***					Untr vs. PR1.25		0.7683	ns
Untr vs. GP 100		0.9993	ns					Untr vs. PR2.5		0.5471	ns
Untr vs. GA 100		0.9994	ns					Untr vs. PR5		0.0338	*
Untr vs. PA 100		0.9511	ns					Untr vs. PR10		<0.0001	****
								Untr vs. PR20		<0.0001	****
