# Supplementary material for: C9orf72 arginine-rich dipeptide repeat proteins disrupt karyopherin-mediated nuclear import
Source: eLife. 2020 Mar 2;9:e51685. doi: 10.7554/eLife.51685 (PMC7051184; doi:10.7554/eLife.51685)
Supplement: Figure 2—source data 1. [file elife-51685-fig2-data1.xlsx]

## Sheet: Fig 2
Raw data
Figure 2B. Rim to background ratio (each value represents the mean of 5 intensity profiles/bead)
Prey	Bare beads																				BSA-coated beads																				Impß-coated beads
Dextran	1.12572	1.11273	1.10028	1.11046	1.10338	1.13265	1.10878	1.10703	1.10521	1.09332	1.13715	1.09169	1.11582	1.09002	1.08975	1.10599	1.0816	1.14176	1.12527	1.10468	1.10969	1.1214	1.13241	1.10899	1.11508	1.09789	1.10875	1.10536	1.10259	1.10073	1.10439	1.07767	1.09127	1.08431	1.08874	1.11651	1.10496	1.08796	1.11976	1.1469	1.12138	1.10734	1.11926	1.11339	1.08544	1.12207	1.09609	1.08647	1.11039
Rango	1.32849	1.3171	1.33201	1.24992	1.31291	1.39847	1.30756	1.31197	1.27959	1.33839	1.3383	1.77276	1.24685	1.33261	1.25681	1.34575	1.29493	1.36298	1.32431	1.29764	1.32206	1.30953	1.26348	1.30526	1.31194	1.28401	1.2386	1.27426	1.34225	1.26874	1.25166	1.55145	1.39826	1.315	1.30074	1.28383	1.26686	1.33557	1.2411	1.32863	7.61492	8.27685	9.92755	9.76689	8.7158	9.7208	8.86698	8.46846	9.72976
GP	1.24195	1.21991	1.21243	1.2072	1.22318	1.25892	1.1833	1.20299	1.23202	1.19464	1.24929	1.18391	1.21783	1.20235	1.1999	1.22081	1.24316	1.20891	1.21919	1.24426	1.25626	1.2047	1.24231	1.25226	1.2311	1.20686	1.21617	1.21309	1.19366	1.21782	1.25471	1.1997	1.26373	1.20581	1.20685	1.25718	1.2474	1.24388	1.2212	1.22251	1.25416	1.2009	1.33328	1.19439	1.21273	1.18501	1.17588	1.43354	1.16795
GA	1.26403	1.29424	1.27825	1.24743	1.25262	1.28658	1.23693	1.2586	1.27961	1.1913	1.27361	1.23322	1.23163	1.32016	1.30204	1.39121	1.27609	1.31228	1.25277	1.30014	1.28781	1.33091	1.31151	1.33293	1.33955	1.36613	1.35355	1.3055	1.25047	1.35578	1.33445	1.25003	1.23707	1.34919	1.35173	1.26139	1.26272	1.28028	1.2681	1.2797	1.26709	1.33107	1.24025	1.24101	1.32184	1.23403	1.27716	1.25638	1.25605
GR	2.84334	2.37327	4.01668	3.72022	2.86424	3.5945	3.34432	3.52258	3.90985	3.99563	3.28894	3.21824	3.2922	2.92921	2.74168	3.29123	2.97073	3.15268	3.04545	2.67946	3.67005	3.84846	3.00882	4.13191	3.69986	3.47211	3.09835	3.75718	4.21079	4.00656	3.96718	4.0685	3.59627	3.24795	3.67191	4.35774	3.84661				7.17232	10.693	11.9038	6.0458	10.2893	5.44842	6.19954	9.20116	10.1787
PR	3.07355	4.46438	3.77396	3.3968	4.40132	4.3101	3.41951	3.99321	3.36725	3.17744	4.62503	4.41427	3.55736	3.9036	3.31765	3.84918	3.64604	3.37917	4.47311	3.75174	3.71292	3.29681	3.25369	3.06089	4.20417	2.63962	3.85064	3.44035	3.58288	3.73095	4.07684	2.73247	3.60092	2.85658	3.91806	3.94712	3.23071	2.54361	2.32134	4.14871	4.64814	6.56642	6.19892	6.55295	5.72235	7.66173	8.73401	6.71357	4.98553
PA	1.20303	1.30926	1.2235	1.24542	1.20554	1.31767	1.20772	1.24607	1.23319	1.17657	1.23578	1.21316	1.19964	1.18493	1.27237	1.22135	1.22094	1.32394	1.2559	1.21206	1.23152	1.2417	1.1796	1.25708	1.1918	1.30381	1.2566	1.23036	1.34989	1.22761	1.22053	1.23209	1.21806	1.26932	1.20929	1.21125	1.20507	1.2549	1.22319	1.2405	1.19943	1.21042	1.25117	1.22553	1.22533	1.24519	1.28491	1.18695	1.24681
Figure 2C. Rim to background ratio (each value represents the mean of 5 intensity profiles/bead)
Bead coating	GR																				GR + lysate
Bare beads	2.84334	2.37327	4.01668	3.72022	2.86424	3.5945	3.34432	3.52258	3.90985	3.99563	3.28894	3.21824	3.2922	2.92921	2.74168	3.29123	2.97073	3.15268	3.04545	2.67946	1.17231	1.21248	1.14101	1.14741	1.19954	1.21888	1.205	1.1736	1.18905	1.19469	1.17684	1.283
BSA	3.8591	3.95196	3.45077	3.76515	3.90684	4.16824	3.43191	4.03995	3.51436	4.59217	4.02508	3.73513	4.34119	3.96241	3.49123	4.05918	3.32585	4.41929	4.07864	4.62501	1.18856	1.19713	1.16804	1.20616	1.28544	1.17457	1.2022	1.24416	1.22094	1.23484	1.20993	1.16144	1.18651	1.16092	1.22977	1.25911	1.22815	1.18927	1.24009	1.16446
ImpB	7.17232	10.693	11.9038	6.0458	10.2893	5.44842	6.19954	9.20116	10.1787	6.41432	8.24587	5.20239	7.3316	11.7954	5.08289	6.36625	7.66278	6.59389	9.81738	6.45239	1.23326	1.48362	1.16464	1.27355	1.23394	1.25245	1.21117	1.22677	1.20026	1.26879	1.22134	1.47941	1.23222	1.20624	1.25263	1.3101	1.26686	1.22354	1.28785	1.22885
Figure 2D. Rim to background ratio (each value represents the mean of 5 intensity profiles/bead)
Bead coating	PR																				PR + lysate
Bare beads	3.07355	4.46438	3.77396	3.3968	4.40132	4.3101	3.41951	3.99321	3.36725	3.17744	4.62503	4.41427	3.55736	3.9036	3.31765	3.84918	3.64604	3.37917	4.47311	3.75174	2.60175	2.43776	2.11342	2.63397	2.92061	3.03548	2.16879	3.12092	3.13275	3.14086	2.66064	2.97341
BSA	4.38266	4.17758	3.90226	3.95031	3.61034	4.90612	3.70201	3.63557	3.54887	3.99658	3.74311	3.99957	4.034	4.33816	3.84066	3.94815	3.63091	4.57574	4.83619	3.32798	2.59838	2.72543	2.45125	2.08663	2.51733	2.83283	2.32733	3.43413	2.60609	3.61786	2.38716	2.78845	3.04368	2.8449	2.67639	3.64378	2.19475	2.93868	2.51481	3.07332
ImpB	4.64814	6.56642	6.19892	6.55295	5.72235	7.66173	8.73401	6.71357	4.98553	5.07269	8.91362	9.36992	5.1014	6.33522	6.97692	8.05801	8.8693	4.36434	6.7054	6.06453	10.8121	6.44142	7.99692	10.6564	8.32588	8.82555	8.68553	9.34976	7.94687	11.2074	9.42206	8.06977	6.7151	10.1913	7.84485	7.8586	5.92772	8.09901	7.72899	9.81403
Statistical analysis
Figure 2B
Two-way ANOVA							Tukey's multiple comparisons		Adjusted P	Summary
Alpha	0.05
							Dextran
Source of Variation	% of total variation	P value	P value summary	Significant?			Beads vs. BSA		>0.9999	ns
Interaction	29.27	<0.0001	****	Yes			Beads vs. Impβ		0.9994	ns
Row Factor	45.32	<0.0001	****	Yes			BSA vs. Impβ		0.9998	ns
Column Factor	17.5	<0.0001	****	Yes
							Rango
ANOVA table	SS (Type III)	DF	MS	F (DFn, DFd)	P value		Beads vs. BSA		0.991	ns
Interaction	783.6	18	43.53	F (18, 529) = 116.6	P<0.0001		Beads vs. Impβ		<0.0001	****
Row Factor	1213	6	202.2	F (6, 529) = 541.7	P<0.0001		BSA vs. Impβ		<0.0001	****
Column Factor	468.5	3	156.2	F (3, 529) = 418.4	P<0.0001
Residual	197.4	529	0.3732				GP
							Beads vs. BSA		0.9989	ns
							Beads vs. Impβ		0.9985	ns
							BSA vs. Impβ		>0.9999	ns
							GA
							Beads vs. BSA		0.9886	ns
							Beads vs. Impβ		0.9994	ns
							BSA vs. Impβ		0.983	ns
							GR
							Beads vs. BSA		0.0668	ns
							Beads vs. Impβ		<0.0001	****
							BSA vs. Impβ		<0.0001	****
							PR
							Beads vs. BSA		0.146	ns
							Beads vs. Impβ		<0.0001	****
							BSA vs. Impβ		<0.0001	****
							PA
							Beads vs. BSA		>0.9999	ns
							Beads vs. Impβ		0.9997	ns
							BSA vs. Impβ		0.9994	ns
Figure 2C
Two-way ANOVA							Sidak's multiple comparisons		Adjusted P	Summary
Alpha	0.05
							GR vs. GR + lysate
Source of Variation	% of total variation	P value	P value summary	Significant?			Beads only		<0.0001	****
Interaction	15.17	<0.0001	****	Yes			BSA		<0.0001	****
Row Factor	16.08	<0.0001	****	Yes			Impβ		<0.0001	****
Column Factor	51.81	<0.0001	****	Yes
ANOVA table	SS (Type III)	DF	MS	F (DFn, DFd)	P value
Interaction	114.5	2	57.26	F (2, 106) = 61.30	P<0.0001
Row Factor	121.4	2	60.69	F (2, 106) = 64.98	P<0.0001
Column Factor	391.1	1	391.1	F (1, 106) = 418.7	P<0.0001
Residual	99.01	106	0.9341
Figure 2D
Two-way ANOVA							Sidak's multiple comparisons		Adjusted P	Summary
Alpha	0.05
							PR vs. PR + lysate
Source of Variation	% of total variation	P value	P value summary	Significant?			Beads only		0.008	**
Interaction	9.78	<0.0001	****	Yes			BSA		0.0002	***
Row Factor	75.99	<0.0001	****	Yes			Impβ		<0.0001	****
Column Factor	0.07508	0.4756	ns	No
ANOVA table	SS (Type III)	DF	MS	F (DFn, DFd)	P value
Interaction	60.56	2	30.28	F (2, 106) = 33.38	P<0.0001
Row Factor	470.5	2	235.3	F (2, 106) = 259.4	P<0.0001
Column Factor	0.4649	1	0.4649	F (1, 106) = 0.5126	P=0.4756
Residual	96.14	106	0.907
[truncated: 11 more columns]

## Sheet: Fig 2-supplement 2
Raw data
B. GR10 Rim to background ratio (each value represents the mean of 5 intensity profiles/bead)										C. PR10 Rim to background ratio (each value represents the mean of 5 intensity profiles/bead)
Bead	Bead + 10	BSA	BSA + 10	ImpB	ImpB + 1.25	ImpB + 2.5	ImpB + 5	ImpB + 10		Bead	Bead + 10	BSA	BSA + 10	ImpB	ImpB + 1.25	ImpB + 2.5	ImpB + 5	ImpB + 10
4.18315	1.25997	6.0443	1.35588	12.8691	15.9981	5.13077	3.08545	1.40968		2.18417	1.19704	3.50324	1.21214	12.0169	12.031	2.97379	1.9728	1.41874
4.62908	1.29205	7.19314	1.23146	10.5298	12.6734	6.1032	3.0356	1.61563		1.99507	1.20298	3.2964	1.31229	20.8175	11.2079	4.78231	2.04267	1.26534
5.1447	1.20547	6.93239	1.22858	14.3672	16.8203	6.6288	2.66807	1.49164		2.52568	1.24361	3.63144	1.21934	13.2037	9.8688	5.78704	1.50181	1.30938
3.7902	1.19497	5.73068	1.19111	14.5297	14.3677	5.61685	2.84168	1.23555		2.46919	1.22695	2.67583	1.22385	19.6519	10.035	3.42252	1.88932	1.2848
3.90904	1.17826	6.12837	1.3451	15.6763	10.4173	5.29206	1.68015	1.3109		2.2467	1.16641	3.03354	1.25334	13.764	11.2533	4.83575	1.92352	1.27411
4.13933	1.2292	5.22076	1.26352	11.6074	17.0307	4.16327	3.2726	1.66773		2.06301	1.23634	4.06539	1.23106	11.36	8.23412	3.17935	2.13451	1.28437
3.52709	1.19802	5.37251	1.24833	12.7923	10.7293	4.4805	2.82805	1.67045		2.0743	1.28605	3.64004	1.25383	10.0731	8.94865	3.82787	1.83672	1.28711
3.63163	1.25022	6.44545	1.27549	10.3584	11.9991	5.60104	2.58311	1.28779		2.16222	1.20105	3.09638	1.21963	16.8744	11.6956	4.18305	2.16272	1.34479
3.48528	1.21841	6.75111	1.24418	14.5517	16.8578	7.77514	3.16002	1.54937		2.26698	1.23446	2.72672	1.21566	14.4371	7.41046	3.45878	2.16963	1.57562
3.38805	1.25655	5.35857	1.3013	14.4726	12.7288	8.18718	4.08468	1.79142		2.38209	1.2039	3.8619	1.23192	10.6411	10.5906	4.25472	2.05372	1.23814
4.26268	1.20443	5.99869	1.23802	9.19646	11.7421	5.0106	2.47289	1.62993		2.41011	1.26762	3.74257	1.19705	12.9095	7.58942	3.29558	2.11956	1.23677
3.91005	1.22099	6.13894	1.36339	11.0342	13.7145	8.42492	2.65517	1.35572		2.31255	1.27322	3.11338	1.18587	9.25484	8.74854	3.3557	1.85894	1.28253
4.23014	1.21051	6.47879	1.22546	11.4638	15.0769	5.9461	3.53768	1.67612		2.14831	1.24802	3.17942	1.23296	16.3842	13.366	4.01775	1.87856	1.54998
3.73781	1.21055	6.65005	1.22754	15.874	11.7947	9.58843	1.90754	1.48302		2.28593	1.2621	3.14941	1.20269	14.3309	8.58207	4.09063	2.05716	1.26819
3.93618	1.27277	5.71238	1.27811	13.1039	16.3325	4.68974	2.22414	1.52425		1.95534	1.19629	3.19967	1.1552	14.8107	11.2175	2.60115	2.02377	1.30312
4.57406	1.23887	5.49826	1.23582	12.7135	17.7166	5.00405	2.81308	1.44817		2.12417	1.2211	3.49924	1.2789	18.3098	11.5233	4.06427	1.76802	1.33235
5.08499	1.23274	6.08908	1.2827	12.3937	12.3556	5.49012	2.7602	1.62675		2.35268	1.24508	2.83084	1.26167	13.2613	10.9888	4.70785	2.20602	1.47974
3.87268	1.23813	5.20029	1.27132	17.2198	14.0143	5.88832	3.264	1.82462		1.98491	1.2124	2.92069	1.28502	11.1741	12.4025	5.22711	1.82029	1.37308
4.23804	1.26098	4.99927	1.31944	12.6942	16.7632	4.85118	2.80949	1.49417		2.58832	1.21539	3.04893	1.19712	14.7332	10.0741	3.9497	1.82165	1.33781
4.36614	1.23288	6.01508	1.25453	16.5759	17.9758	6.07046	2.25314	1.92049		2.01131	1.22754	3.04396	1.1872	10.0602	10.825	3.65811	2.17567	1.29097
Statistical analysis
Figure B-GR										Figure C-PR
One-way ANOVA										One-way ANOVA
F (8, 174) = 334.5	P<0.0001									F (8, 171) = 268.8	P<0.0001
Tukey's multiple comparisons*		Adjusted P	Summary							Tukey's multiple comparisons*		Adjusted P	Summary
Bead vs. Bead-ImpB 10.0		<0.0001	****							Bead vs. Bead-ImpB 10.0		0.2234	ns
BSA vs. BSA-ImpB 10.0		<0.0001	****							BSA vs. BSA-ImpB 10.0		<0.0001	****
ImpB vs. ImpB-ImpB 1.25		0.0797	****							ImpB vs. ImpB-ImpB 1.25		<0.0001	****
ImpB vs. ImpB-ImpB 2.5		<0.0001	****							ImpB vs. ImpB-ImpB 2.5		<0.0001	****
ImpB vs. ImpB-ImpB 5		<0.0001	****							ImpB vs. ImpB-ImpB 5		<0.0001	****
ImpB vs. ImpB-ImpB 10		<0.0001	****							ImpB vs. ImpB-ImpB 10		<0.0001	****
*only selected comparisons shown										*only selected comparisons shown
