# Supplementary material for: C9orf72 arginine-rich dipeptide repeat proteins disrupt karyopherin-mediated nuclear import
Source: eLife. 2020 Mar 2;9:e51685. doi: 10.7554/eLife.51685 (PMC7051184; doi:10.7554/eLife.51685)
Supplement: Figure 3—source data 1. [file elife-51685-fig3-data1.xlsx]

## Sheet: Figure 3
Figure 3B. GFP nuclear intensity (vs. time 0). Each value represents the mean of 20-30 cells
Time (sec)	Untr								WGA							GR10-100 µM				GR20-20 µM				PR10-100 µM				PR20-20 µM					One-way ANOVA for differences in nuclear intensity at 5 minutes
	plate 1	2	3	4	5	6	7		plate 1	2	3	4	5	6		plate 1	2	3		plate 1	2	3		plate 1	2	3		plate 1	2	3			F (5, 19) = 22.12	P<0.0001
0:00:10	1	1	1	1	1	1	1		1	1	1	1	1	1		1	1	1		1	1	1		1	1	1		1	1	1
0:00:20	1.17827	1.03498	1.0228	1.02476	1.21302	1.04972	1.17827		0.950568	1	0.984451	0.910076	0.930678	1.02059		1.18682	1.24638	1.23154		1.18069	1.2072	1.10592		1.09271	1.32316	1.22203		1.1105	1.29041	1.37275			Dunnett's post-hoc test ( all conditions vs. untreated)
0:00:30	1.39801	1.09987	1.06751	1.13939	1.49423	1.15297	1.39801		0.935371	0.881474	0.963042	0.911749	0.90487	1.05176		1.3822	1.5176	1.47784		1.38719	1.50582	1.40381		1.18738	1.64549	1.50583		1.25928	1.58833	1.72776
0:00:40	1.62516	1.18844	1.13457	1.26627	1.73779	1.27509	1.62516		0.912717	0.819358	0.95525	0.914851	0.892095	1.10096		1.58634	1.79757	1.77455		1.60063	1.81607	1.73027		1.28997	1.95768	1.70189		1.42845	1.91021	2.08406				Adjusted P	Summary
0:00:50	1.84487	1.26158	1.2086	1.36342	1.9934	1.39469	1.84487		0.916713	0.798668	0.955004	0.885469	0.890303	1.1349		1.79533	2.08339	1.99745		1.81177	2.12376	2.13757		1.40691	2.23725	1.85753		1.57481	2.22946	2.48888			Untr vs. WGA	0.0007	***
0:01:00	2.04664	1.34451	1.29	1.43319	2.21151	1.50494	2.04664		0.903758	0.788992	0.956683	0.908889	0.892535	1.18024		1.97233	2.34324	2.26264		2.06702	2.49147	2.54055		1.52311	2.52756	2.04927		1.7652	2.53708	2.53789			Untr vs. GR10-100 µM	0.0075	**
0:01:10	2.21488	1.42956	1.37673	1.53295	2.40002	1.59822	2.21488		0.915169	0.771791	0.951125	0.879209	0.881576	1.21241		2.16756	2.57136	2.51161		2.27382	2.83387	2.87873		1.62981	2.768	2.26082		1.93076	2.83627	2.73083			Untr vs. GR20-20 µM	0.0005	***
0:01:20	2.37332	1.51621	1.44701	1.58632	2.61037	1.68911	2.37332		0.913044	0.754033	0.952117	0.907777	0.896095	1.24201		2.33924	2.82406	2.7568		2.52073	3.08584	3.16942		1.72727	2.98307	2.40663		2.10045	3.12318	2.86702			Untr vs. PR10-100 µM	0.5229	ns
0:01:30	2.54171	1.58572	1.5337	1.64491	2.7721	1.78528	2.54171		0.912313	0.759475	0.962647	0.930214	0.904905	1.26531		2.50322	3.03378	2.94149		2.74329	3.29291	3.36746		1.849	3.18495	2.58598		2.25436	3.3463	3.04144			Untr vs. PR20-20 µM	0.0109	*
0:01:40	2.65417	1.66569	1.60695	1.68209	2.96752	1.86584	2.65417		0.922749	0.761031	0.958542	0.8879	0.898563	1.29679		2.65131	3.24775	3.12269		2.95902	3.49615	3.61656		1.92718	3.3904	2.81533		2.44409	3.59209	3.15066
0:01:50	2.78163	1.71697	1.67193	1.76009	3.12155	1.94192	2.78163		0.917031	0.750144	0.964634	0.891515	0.905102	1.33341		2.81273	3.46953	3.27855		3.1957	3.63565	3.78978		2.01501	3.54946	2.91132		2.58972	3.85086	3.32571
0:02:00	2.85144	1.80063	1.73279	1.82513	3.27553	2.01412	2.85144		0.931186	0.74284	0.972711	0.905718	0.90973	1.36099		2.99983	3.66228	3.47775		3.37866	3.78308	3.96149		2.11891	3.67654	3.02578		2.77371	4.09431	3.50296
0:02:10	2.9112	1.85144	1.77058	1.8534	3.41662	2.0815	2.9112		0.945972	0.73711	0.976695	0.914602	0.916366	1.37791		3.12486	3.87779	3.64116		3.58989	3.91841	4.13672		2.18662	3.83113	3.13776		2.92139	4.27407	3.57763
0:02:20	3.02045	1.92796	1.82962	1.88447	3.54539	2.1574	3.02045		0.952484	0.746778	0.978237	0.949762	0.914661	1.39827		3.29204	4.08251	3.8111		3.81586	4.01561	4.26416		2.29203	3.96955	3.20768		3.0891	4.49196	3.70498
0:02:30	3.09258	1.99237	1.87861	1.93285	3.68094	2.22192	3.09258		0.937573	0.733187	0.982304	0.932025	0.927493	1.42061		3.44642	4.25016	3.94931		3.99909	4.14271	4.39715		2.36709	4.05282	3.25885		3.23941	4.75576	3.79699
0:02:40	3.15239	2.0321	1.9157	1.96794	3.76697	2.24574	3.15239		0.952282	0.73873	0.980382	0.931803	0.932615	1.44551		3.59513	4.44625	4.08524		4.22887	4.23372	4.55573		2.46006	4.18736	3.32731		3.36979	4.85211	3.79578
0:02:50	3.24146	2.11143	1.95507	2.02249	3.84649	2.3334	3.24146		0.950113	0.724401	0.98662	0.905992	0.943189	1.4544		3.72937	4.61533	4.2034		4.38576	4.32289	4.67689		2.51986	4.27895	3.3824		3.50747	5.06297	3.8276
0:03:00	3.34135	2.15825	1.99632	2.02568	3.91884	2.35444	3.34135		0.962648	0.737252	0.98438	0.936665	0.952654	1.46875		3.85797	4.77075	4.26812		4.57861	4.38645	4.78914		2.59391	4.35801	3.36162		3.5941	5.19623	3.94873
0:03:10	3.37179	2.20869	2.04134	2.06047	4.03845	2.40091	3.37179		0.966512	0.735713	0.993569	0.960792	0.950625	1.46761		3.99076	4.8938	4.29268		4.80007	4.53472	4.88659		2.66678	4.40451	3.45485		3.75406	5.35924	3.85768
0:03:20	3.42631	2.26158	2.07369	2.10046	4.08882	2.43364	3.42631		0.957786	0.736146	0.992083	0.945238	0.959058	1.49375		4.08263	5.01279	4.36699		4.95552	4.60203	5.04282		2.71687	4.46378	3.48881		3.82677	5.4381	4.02605
0:03:30	3.5059	2.31723	2.08203	2.08947	4.19365	2.47499	3.5059		0.961086	0.741105	0.998036	0.968615	0.963432	1.50039		4.14842	5.09481	4.32814		5.13216	4.65501	5.17079		2.78905	4.51585	3.50804		3.96362	5.65134	4.01182
0:03:40	3.56296	2.35527	2.11192	2.10897	4.28036	2.48677	3.56296		0.975743	0.733934	1.00229	0.99602	0.963216	1.50732		4.30092	5.20935	4.41604		5.29151	4.73637	5.24741		2.83695	4.54492	3.5664		4.09751	5.7436	4.06915
0:03:50	3.60085	2.41768	2.13083	2.14728	4.29416	2.50427	3.60085		0.993386	0.732254	0.998712	0.941475	0.972472	1.5376		4.45815	5.23837	4.44241		5.42525	4.79019	5.37566		2.88634	4.59134	3.57324		4.17269	5.82005	3.97915
0:04:00	3.63551	2.45989	2.13956	2.15854	4.36338	2.53272	3.63551		0.987945	0.720156	1.01559	0.949502	0.974005	1.57021		4.47121	5.33995	4.50841		5.63966	4.84571	5.47506		2.9444	4.64966	3.57614		4.27759	5.96971	4.03967
0:04:10	3.68161	2.50149	2.16769	2.20201	4.3958	2.5445	3.68161		0.990144	0.726885	1.01044	0.92378	0.983537	1.58883		4.58626	5.40651	4.58866		5.79015	4.8895	5.58952		2.98294	4.71042	3.62466		4.35641	6.03673	4.10836
0:04:20	3.7171	2.56373	2.20316	2.20805	4.47091	2.55933	3.7171		1.00045	0.736961	1.02199	0.974988	0.9873	1.61447		4.67217	5.47195	4.68926		5.90196	4.91082	5.70075		3.0314	4.7676	3.66257		4.4686	6.14839	4.08705
0:04:30	3.76546	2.56631	2.21579	2.24318	4.52779	2.60079	3.76546		1.00541	0.737333	1.025	0.98765	1.00287	1.63395		4.7402	5.53373	4.75253		6.08985	4.95827	5.76561		3.04411	4.87025	3.73268		4.58109	6.19955	4.0541
0:04:40	3.80249	2.62556	2.24494	2.29983	4.57227	2.58626	3.80249		1.00191	0.751744	1.02979	0.96172	1.0153	1.64447		4.8136	5.65	4.77036		6.17915	5.02372	5.86285		3.10179	4.90797	3.70787		4.65594	6.28057	3.9934
0:04:50	3.85483	2.67165	2.27153	2.33604	4.62634	2.61793	3.85483		1.01442	0.75201	1.02766	0.937994	1.01785	1.66668		4.87978	5.6734	4.81516		6.32391	5.04539	5.96555		3.17984	4.95832	3.75961		4.67896	6.46443	3.96458
0:05:00	3.82836	2.71399	2.31392	2.33868	4.68502	2.62756	3.82836		1.02925	0.75688	1.03316	0.950183	1.02696	1.68045		4.98904	5.73453	4.88851		6.46791	5.1136	6.06116		3.16504	5.03868	3.75841		4.77111	6.51697	4.05229
Figure 3C. 40 kD dextran nuclear intensity (vs. time 0). Each value represents the mean of 20-30 cells
Time (sec)	Untr						WGA					GR10-100 µM				GR20-20 µM				PR10-100 µM				PR20-20 µM									One-way ANOVA for differences in nuclear intensity at 5 minutes
	plate 1	2	3	4	5		plate 1	2	3	4		plate 1	2	3		plate 1	2	3		plate 1	2	3		plate 1	2								F (5, 14) = 5.708	P=0.0045
0:00:10	1	1	1	1	1		1	1	1	1		1	1	1		1	1	1		1	1	1		1	1
0:00:20	1.1831	1.10398	1.11859	1.07325	1.12213		1.20616	1.12289	1.10586	1.11855		1.23351	1.25597	1.22492		1.21993	1.18053	1.13474		1.23123	1.16546	1.18378		1.20957	1.20957								Dunnett's post-hoc test ( all conditions vs. untreated)
0:00:30	1.30992	1.20346	1.21552	1.12427	1.2034		1.35365	1.17569	1.16999	1.20841		1.41263	1.45078	1.37948		1.42617	1.31455	1.29193		1.41826	1.3024	1.32615		1.38005	1.38005
0:00:40	1.3961	1.37143	1.2916	1.16806	1.27198		1.48007	1.23219	1.21776	1.28149		1.55448	1.60927	1.50928		1.59506	1.42627	1.44128		1.57487	1.40641	1.42327		1.52376	1.52376									Adjusted P	Summary
0:00:50	1.47243	1.38564	1.36397	1.20313	1.3258		1.58122	1.26159	1.25435	1.33881		1.67284	1.74945	1.62959		1.71507	1.52374	1.60092		1.71662	1.48434	1.49494		1.64429	1.64429								Untr vs. WGA	>0.9999	ns
0:01:00	1.53945	1.46547	1.41224	1.23734	1.38134		1.66589	1.30813	1.29498	1.39146		1.78901	1.86462	1.7469		1.84263	1.63213	1.73898		1.84526	1.56179	1.57346		1.75415	1.75415								Untr vs. GR10-100 µM	0.0059	**
0:01:10	1.60308	1.56065	1.46838	1.26995	1.42814		1.73074	1.32696	1.32397	1.44197		1.8729	1.96667	1.84919		1.95363	1.73351	1.85604		1.95093	1.64963	1.66689		1.84753	1.84753								Untr vs. GR20-20 µM	0.1636	ns
0:01:20	1.65947	1.52574	1.5073	1.29801	1.46787		1.78806	1.36255	1.34855	1.47588		1.95946	2.05746	1.94133		2.04589	1.81679	1.9228		2.05589	1.71293	1.7197		1.93781	1.93781								Untr vs. PR10-100 µM	0.0947	ns
0:01:30	1.70988	1.53272	1.55286	1.32982	1.50453		1.84395	1.40224	1.37169	1.5181		2.04536	2.13898	2.0237		2.14678	1.86717	1.98171		2.14457	1.75931	1.77684		2.02257	2.02257								Untr vs. PR20-20 µM	0.0194	*
0:01:40	1.75296	1.56873	1.5894	1.35303	1.53847		1.88633	1.3962	1.39395	1.53981		2.12244	2.21974	2.10871		2.22171	1.89106	2.01561		2.22038	1.82385	1.83394		2.09756	2.09756
0:01:50	1.79838	1.65895	1.62148	1.37527	1.58536		1.92853	1.41283	1.41692	1.58268		2.19727	2.29666	2.16623		2.29832	1.90865	2.06249		2.29745	1.87061	1.87936		2.17073	2.17073
0:02:00	1.82506	1.70894	1.65347	1.39568	1.61671		1.97269	1.43637	1.43545	1.62066		2.25472	2.37161	2.23361		2.38135	1.92351	2.09146		2.37632	1.89423	1.9779		2.24857	2.24857
0:02:10	1.86358	1.66794	1.68294	1.41306	1.65216		2.00288	1.4624	1.46037	1.65471		2.32409	2.43281	2.28829		2.4467	1.93709	2.12735		2.44554	1.92929	1.97457		2.30552	2.30552
0:02:20	1.88798	1.69588	1.71074	1.42507	1.69119		2.04185	1.49641	1.46528	1.69063		2.38897	2.50416	2.35303		2.5083	1.95152	2.14243		2.5052	1.96959	2.0621		2.36373	2.36373
0:02:30	1.91469	1.73277	1.73461	1.4476	1.72015		2.07463	1.49587	1.49078	1.71813		2.45325	2.56222	2.41199		2.57397	1.96244	2.15408		2.56952	2.00131	2.02932		2.42327	2.42327
0:02:40	1.927	1.76252	1.75553	1.46334	1.75306		2.10846	1.50742	1.50632	1.75772		2.51732	2.62604	2.46491		2.6161	1.98052	2.18339		2.62798	2.03288	2.06274		2.47775	2.47775
0:02:50	1.95078	1.79191	1.77852	1.48319	1.78872		2.13892	1.51638	1.53328	1.76623		2.57312	2.68556	2.50997		2.65858	1.99014	2.17747		2.68411	2.05988	2.10392		2.52304	2.52304
0:03:00	1.97118	1.80502	1.80182	1.50419	1.81413		2.17303	1.53915	1.5577	1.7759		2.62855	2.74364	2.53738		2.70958	1.9943	2.20145		2.72241	2.08348	2.11239		2.56467	2.56467
0:03:10	1.99236	1.86356	1.81695	1.52341	1.8421		2.19762	1.54477	1.55862	1.79494		2.677	2.79366	2.56234		2.76177	2.00773	2.19959		2.78012	2.09674	2.12576		2.61583	2.61583
0:03:20	2.00953	1.92588	1.83182	1.54009	1.86422		2.21843	1.55198	1.56613	1.82231		2.73082	2.83666	2.58362		2.80847	2.01945	2.2283		2.82808	2.12643	2.13748		2.65486	2.65486
0:03:30	2.02097	1.82555	1.8636	1.55527	1.88268		2.23848	1.55943	1.58376	1.82735		2.77558	2.88872	2.59513		2.8385	2.02926	2.22291		2.86155	2.14453	2.1601		2.6942	2.6942
0:03:40	2.03741	1.8609	1.87162	1.56848	1.90212		2.26224	1.58445	1.58849	1.84542		2.80488	2.92407	2.60538		2.88746	2.03882	2.23697		2.90316	2.16614	2.19022		2.72532	2.72532
0:03:50	2.04821	1.93095	1.89958	1.58503	1.90913		2.29701	1.56887	1.60813	1.87607		2.85296	2.96714	2.63972		2.91943	2.04448	2.2516		2.95446	2.17582	2.20725		2.77379	2.77379
0:04:00	2.06053	1.9087	1.91038	1.59333	1.91541		2.31057	1.57332	1.61674	1.92155		2.90292	3.00107	2.66983		2.97986	2.05961	2.27874		2.99936	2.194	2.26649		2.80308	2.80308
0:04:10	2.06779	1.94532	1.93309	1.60524	1.92197		2.33883	1.58469	1.63896	1.9575		2.92422	3.03184	2.71681		3.02876	2.05439	2.28574		3.05272	2.2177	2.29051		2.82987	2.82987
0:04:20	2.09107	1.91785	1.94391	1.61522	1.93161		2.36159	1.60801	1.65412	1.99747		2.95624	3.05981	2.7491		3.05609	2.05811	2.30423		3.0797	2.25536	2.27974		2.87465	2.87465
0:04:30	2.11114	1.93514	1.96441	1.62421	1.94358		2.38839	1.61797	1.68124	2.03147		2.97645	3.09544	2.77631		3.10675	2.05831	2.30483		3.10407	2.29163	2.3066		2.92325	2.92325
0:04:40	2.13747	2.02936	1.97403	1.63521	1.97332		2.40213	1.61687	1.69853	2.06098		3.01529	3.12289	2.79963		3.13565	2.06943	2.33188		3.15512	2.28869	2.32625		2.95478	2.95478
0:04:50	2.15097	2.06977	1.97865	1.64385	1.9773		2.41863	1.62307	1.70752	2.08591		3.05899	3.15879	2.80502		3.17138	2.07344	2.34185		3.196	2.32708	2.32269		2.9635	2.9635
0:05:00	2.16681	2.01255	1.99746	1.6479	1.99609		2.44731	1.63721	1.71731	2.11738		3.07608	3.20358	2.81021		3.23548	2.08557	2.34923		3.2084	2.38233	2.3288		2.99559	2.99559

## Sheet: Figure 3-figure suppl 1
Figure 3-supplemental figure 1B. dextran nuclear intensity (vs. time 0). Each value represents the mean of 20-30 cells
Time (sec)	10 kD							40 kD									70 kD
	plate 1	2	3	4	5	6		plate 1	2	3	4	5	6	7	8		plate 1	2	3
0:00:10 sec	1	1	1	1	1	1		1	1	1	1	1	1	1	1		1	1	1
0:00:20	1.27809	1.19101	1.26937	1.28916	1.2733	1.18189		1.21893	1.13329	1.22055	1.1831	1.10398	1.11859	1.07325	1.12213		0.985713	0.997347	1.01152
0:00:30	1.46103	1.33263	1.45676	1.48499	1.44369	1.31414		1.36189	1.21536	1.3979	1.30992	1.20346	1.21552	1.12427	1.2034		0.963369	0.99913	1.03319
0:00:40	1.59974	1.44684	1.61016	1.62373	1.58763	1.42013		1.46682	1.27702	1.52952	1.3961	1.37143	1.2916	1.16806	1.27198		0.965353	1.00059	1.05243
0:00:50	1.7146	1.55743	1.75483	1.75186	1.70212	1.50743		1.54607	1.31263	1.66719	1.47243	1.38564	1.36397	1.20313	1.3258		0.957405	1.00699	1.07705
0:01:00	1.80389	1.63962	1.90033	1.85709	1.79293	1.58012		1.61042	1.3556	1.83076	1.53945	1.46547	1.41224	1.23734	1.38134		0.944025	1.0133	1.09406
0:01:10	1.88209	1.71389	2.01739	1.95502	1.90678	1.64229		1.65921	1.39198	1.96308	1.60308	1.56065	1.46838	1.26995	1.42814		0.953602	1.01298	1.11779
0:01:20	1.9473	1.79863	2.13149	2.01999	1.97506	1.69267		1.7084	1.42704	2.10211	1.65947	1.52574	1.5073	1.29801	1.46787		0.958983	1.02102	1.12918
0:01:30	2.00846	1.91122	2.216	2.09259	2.06508	1.73746		1.75186	1.45436	2.21392	1.70988	1.53272	1.55286	1.32982	1.50453		0.965067	1.02135	1.14238
0:01:40	2.06667	1.95509	2.28916	2.15015	2.13462	1.77854		1.79466	1.48703	2.3212	1.75296	1.56873	1.5894	1.35303	1.53847		0.961888	1.02972	1.16006
0:01:50	2.11886	1.99336	2.37085	2.20338	2.20202	1.81467		1.83584	1.5061	2.42146	1.79838	1.65895	1.62148	1.37527	1.58536		0.960864	1.03676	1.17195
0:02:00	2.17235	2.03932	2.44392	2.24523	2.26745	1.85413		1.87572	1.52517	2.49928	1.82506	1.70894	1.65347	1.39568	1.61671		0.973558	1.04507	1.17935
0:02:10	2.22047	2.0944	2.50867	2.27849	2.3299	1.89449		1.91213	1.55234	2.57887	1.86358	1.66794	1.68294	1.41306	1.65216		0.98704	1.03919	1.19783
0:02:20	2.26369	2.12987	2.56665	2.32251	2.37119	1.91898		1.94882	1.56918	2.62951	1.88798	1.69588	1.71074	1.42507	1.69119		0.975396	1.04461	1.20129
0:02:30	2.30242	2.18145	2.62904	2.36698	2.40459	1.95492		1.98304	1.58387	2.69067	1.91469	1.73277	1.73461	1.4476	1.72015		0.978599	1.04202	1.21835
0:02:40	2.33891	2.21838	2.67066	2.38523	2.45624	1.98704		2.01208	1.60743	2.74237	1.927	1.76252	1.75553	1.46334	1.75306		0.985897	1.04569	1.23513
0:02:50	2.37738	2.26231	2.7365	2.44076	2.47259	2.0134		2.03801	1.63086	2.76116	1.95078	1.79191	1.77852	1.48319	1.78872		0.992304	1.04776	1.24728
0:03:00	2.41475	2.31668	2.76244	2.48719	2.50535	2.04269		2.06742	1.65185	2.79368	1.97118	1.80502	1.80182	1.50419	1.81413		0.993433	1.0529	1.24265
0:03:10	2.44362	2.35429	2.80676	2.49923	2.54704	2.05755		2.09285	1.67441	2.82005	1.99236	1.86356	1.81695	1.52341	1.8421		0.99474	1.0556	1.25526
0:03:20	2.4758	2.39292	2.84754	2.54312	2.56421	2.07142		2.11957	1.69191	2.83334	2.00953	1.92588	1.83182	1.54009	1.86422		0.993804	1.05751	1.26313
0:03:30	2.50284	2.42157	2.84636	2.55022	2.58785	2.10051		2.14112	1.706	2.83823	2.02097	1.82555	1.8636	1.55527	1.88268		1.00421	1.05845	1.26404
0:03:40	2.53016	2.45566	2.86486	2.59737	2.60407	2.10334		2.16353	1.72822	2.84559	2.03741	1.8609	1.87162	1.56848	1.90212		1.01195	1.06512	1.28856
0:03:50	2.56132	2.4918	2.88774	2.6091	2.61414	2.13546		2.1884	1.74847	2.88952	2.04821	1.93095	1.89958	1.58503	1.90913		1.00073	1.07961	1.28538
0:04:00	2.58807	2.52304	2.91317	2.61561	2.67521	2.15055		2.21085	1.76363	2.8778	2.06053	1.9087	1.91038	1.59333	1.91541		1.00949	1.081	1.3046
0:04:10	2.60267	2.55271	2.93402	2.64327	2.69607	2.16114		2.22692	1.78922	2.8889	2.06779	1.94532	1.93309	1.60524	1.92197		1.02378	1.08437	1.30645
0:04:20	2.63528	2.57939	2.96554	2.66843	2.71974	2.18307		2.25045	1.80201	2.89469	2.09107	1.91785	1.94391	1.61522	1.93161		1.02264	1.08734	1.32823
0:04:30	2.66856	2.60569	2.99732	2.67948	2.77147	2.19765		2.26892	1.81965	2.89208	2.11114	1.93514	1.96441	1.62421	1.94358		1.02289	1.09545	1.33713
0:04:40	2.68104	2.63604	3.04074	2.67266	2.81015	2.20535		2.29163	1.83991	2.90179	2.13747	2.02936	1.97403	1.63521	1.97332		1.02868	1.10288	1.35478
0:04:50	2.70309	2.65229	3.06297	2.68297	2.81755	2.22772		2.31242	1.85587	2.93017	2.15097	2.06977	1.97865	1.64385	1.9773		1.03568	1.11293	1.36141
0:05:00	2.72541	2.68248	3.08222	2.67211	2.85415	2.24456		2.31242	1.87556	2.94092	2.16681	2.01255	1.99746	1.6479	1.99609		1.03568	1.11453	1.37581
Figure 3-supplemental figure 1C. dextran nuclear intensity (non-normalized, single plate). Each value represents the mean of 20-30 cells
Time (sec)	-WGA		+WGA
	-Lysate/Energy	+Lysate/Energy	-Lysate/Energy	+Lysate/Energy
0:00:10 sec	0.242078	0.408956	0.327622	0.325154
0:00:20	0.262814	0.34478	0.33339	0.320555
0:00:30	0.293261	0.319572	0.346284	0.313663
0:00:40	0.325969	0.309082	0.366415	0.311479
0:00:50	0.362152	0.300505	0.389298	0.311487
0:01:00	0.385567	0.297303	0.414393	0.31238
0:01:10	0.422298	0.292261	0.440756	0.311374
0:01:20	0.446961	0.291962	0.462744	0.311682
0:01:30	0.471009	0.292162	0.489628	0.316047
0:01:40	0.499742	0.287692	0.512387	0.314734
0:01:50	0.526419	0.290287	0.532238	0.317061
0:02:00	0.549105	0.287693	0.550987	0.31993
0:02:10	0.565376	0.290658	0.562634	0.32162
0:02:20	0.595007	0.292384	0.581389	0.322427
0:02:30	0.610864	0.290437	0.596019	0.324542
0:02:40	0.62903	0.289638	0.607683	0.324036
0:02:50	0.64762	0.290114	0.619963	0.325854
0:03:00	0.664559	0.293076	0.633002	0.325322
0:03:10	0.680141	0.292518	0.646681	0.328791
0:03:20	0.700757	0.292959	0.656622	0.328419
0:03:30	0.707962	0.294105	0.659258	0.330923
0:03:40	0.725701	0.293616	0.668402	0.331827
0:03:50	0.74207	0.294078	0.674229	0.331218
0:04:00	0.758016	0.292645	0.676797	0.336867
0:04:10	0.771021	0.298239	0.685748	0.335251
0:04:20	0.775579	0.295542	0.696242	0.339341
0:04:30	0.781976	0.298056	0.700473	0.339758
0:04:40	0.791661	0.297339	0.709329	0.341973
0:04:50	0.804585	0.300339	0.717335	0.3415
0:05:00	0.812453	0.302161	0.730647	0.343522
Figure 3-figure supplement 1D. GFP nuclear intensity (vs. time 0). Each value represents the mean of 20-30 cells
Time (sec)	Untreated						GP10 100 µM						GA10 100 µM						PA10 100 µM
	1	2	3	4	5	6	1	2	3	4	5	6	1	2	3	4	5	6	1	2	3	4	5	6
0:00:10 sec	1	1	1	1	1	1	1	1	1	1	1	1	1	1	1	1	1	1	1	1	1	1	1	1
0:00:20	1.06358	1.15522	1.13239	1.15044	1.19898	1.25781	0.926224	1.10846	1.06241	1.16921	1.28222	1.11726	1.09903	1.14031	1.20016	1.23913	1.24521	1.21423	1.1364	1.06423	1.18585	1.21721	1.33735	1.18198
0:00:30	1.12987	1.27934	1.29337	1.32023	1.37681	1.50193	0.956005	1.20314	1.16809	1.44526	1.4829	1.25033	1.2016	1.25125	1.41171	1.49113	1.45079	1.424	1.26167	1.13382	1.38258	1.43855	1.51736	1.33765
0:00:40	1.20532	1.39892	1.41613	1.46231	1.54622	1.74046	1.00041	1.30265	1.26397	1.67046	1.69737	1.37549	1.29591	1.36773	1.62656	1.73969	1.68674	1.57488	1.38039	1.23362	1.56489	1.64067	1.64004	1.49313
0:00:50	1.27224	1.50484	1.57515	1.62244	1.71976	1.93796	1.06179	1.39833	1.42222	1.84785	1.87555	1.5007	1.39455	1.49984	1.80239	1.93063	1.86913	1.71814	1.48973	1.31199	1.72611	1.83493	1.71368	1.65475
0:01:00	1.33501	1.59548	1.68123	1.77301	1.86863	2.12588	1.11273	1.5168	1.53934	1.99576	2.02941	1.63167	1.47831	1.61009	1.97426	2.07531	2.04713	1.83513	1.59694	1.38465	1.86665	2.02939	1.78175	1.79626
0:01:10	1.39436	1.69053	1.80078	1.98909	2.00052	2.28662	1.1639	1.59615	1.6865	2.07145	2.14527	1.7627	1.57791	1.71248	2.08747	2.21434	2.20389	1.96273	1.68946	1.45038	2.01585	2.175	1.82633	1.9148
0:01:20	1.45743	1.7624	1.89861	2.13768	2.08446	2.41739	1.19849	1.66758	1.78467	2.12486	2.31107	1.8679	1.64368	1.79735	2.21061	2.31977	2.34794	2.076	1.76917	1.51457	2.13528	2.37881	1.87681	2.05251
0:01:30	1.51825	1.83394	1.9898	2.28319	2.1952	2.52039	1.27259	1.76108	1.89022	2.20956	2.40266	1.9668	1.70631	1.89989	2.34098	2.44842	2.47166	2.17681	1.84443	1.59292	2.26175	2.52418	1.89464	2.15394
0:01:40	1.5724	1.91017	2.06707	2.36223	2.24971	2.6154	1.31688	1.83583	1.95529	2.24113	2.4791	2.06651	1.79516	1.97526	2.43605	2.53747	2.58032	2.27626	1.92448	1.63613	2.35014	2.64605	1.91543	2.27087
0:01:50	1.63954	1.96829	2.16683	2.42273	2.33838	2.68596	1.3596	1.90532	2.04408	2.32664	2.57262	2.14536	1.83644	2.0337	2.55167	2.64091	2.6903	2.34362	1.98146	1.69286	2.4481	2.78821	1.96175	2.34148
0:02:00	1.68819	2.00822	2.2346	2.46792	2.37416	2.73316	1.40434	1.97767	2.11704	2.36571	2.63626	2.246	1.91455	2.11924	2.65229	2.75374	2.78253	2.45377	2.04663	1.76014	2.55105	2.91743	1.97493	2.43209
0:02:10	1.74663	2.0676	2.25693	2.51869	2.44177	2.82744	1.4385	2.03815	2.18086	2.43549	2.68207	2.32749	1.95328	2.17236	2.73708	2.79388	2.91208	2.51685	2.10833	1.79555	2.62469	3.01413	1.98765	2.54749
0:02:20	1.80271	2.09833	2.31491	2.55388	2.51974	2.85446	1.45555	2.08072	2.21916	2.49484	2.79769	2.38998	2.01721	2.24983	2.8074	2.90387	2.95622	2.58584	2.1623	1.86174	2.69727	3.12047	2.01017	2.6088
0:02:30	1.84078	2.13145	2.34913	2.54774	2.55561	2.89105	1.47622	2.15976	2.28122	2.52482	2.85571	2.46861	2.07	2.3006	2.91459	2.99284	3.04724	2.65236	2.19189	1.91309	2.75205	3.1878	2.02907	2.71459
0:02:40	1.87359	2.16014	2.43064	2.59434	2.60761	2.98014	1.49415	2.19207	2.35794	2.57182	2.89262	2.55159	2.10361	2.35316	2.98108	3.04097	3.09456	2.71828	2.24582	1.95415	2.8478	3.25658	2.03874	2.77843
0:02:50	1.93369	2.18307	2.44749	2.60176	2.66724	3.01303	1.52206	2.23855	2.40671	2.64919	2.94572	2.59955	2.15659	2.4241	3.04634	3.08636	3.1376	2.78002	2.29006	2.00071	2.89294	3.31436	2.04035	2.86252
0:03:00	1.95381	2.19791	2.49429	2.64084	2.70192	3.02577	1.52621	2.24983	2.41912	2.66587	2.99408	2.67378	2.21048	2.44994	3.10588	3.18817	3.19879	2.80715	2.32555	2.04088	2.95122	3.39168	2.04434	2.88873
0:03:10	1.98775	2.21834	2.52434	2.66402	2.74878	3.07847	1.53761	2.29029	2.46684	2.68604	3.03925	2.72929	2.26371	2.46776	3.11779	3.22668	3.28877	2.90266	2.37821	2.07926	2.99747	3.45497	2.0742	2.94197
0:03:20	2.0324	2.23472	2.58937	2.67152	2.7795	3.09272	1.56918	2.31961	2.49281	2.72894	3.03341	2.83041	2.33394	2.53573	3.22482	3.29874	3.33949	2.91691	2.40426	2.1182	3.01955	3.49006	2.06929	3.01988
0:03:30	2.073	2.25443	2.63596	2.70024	2.81147	3.12768	1.58822	2.34916	2.51912	2.73745	3.08066	2.83855	2.3512	2.57312	3.22522	3.32623	3.38131	3.00147	2.4501	2.15422	3.0574	3.56032	2.09941	3.0834
0:03:40	2.07007	2.25312	2.67946	2.72438	2.82852	3.14276	1.60787	2.39953	2.591	2.7756	3.12289	2.90337	2.3899	2.62894	3.28718	3.32876	3.42679	3.03955	2.48502	2.17214	3.06418	3.58363	2.11196	3.08179
0:03:50	2.10526	2.28842	2.72132	2.71721	2.89663	3.15638	1.62957	2.44494	2.57672	2.80267	3.11051	2.94606	2.44369	2.65508	3.3439	3.32449	3.46438	3.07796	2.54882	2.21644	3.1245	3.60285	2.1327	3.13107
0:04:00	2.16629	2.28087	2.76939	2.72995	2.89447	3.22171	1.65331	2.44397	2.61219	2.83058	3.11881	2.97985	2.46403	2.69137	3.38914	3.363	3.48527	3.14458	2.52283	2.24797	3.11742	3.58432	2.12354	3.12557
0:04:10	2.20185	2.29555	2.80766	2.73489	2.91138	3.23531	1.68509	2.46708	2.64986	2.85	3.16255	3.01929	2.48043	2.71605	3.42557	3.3658	3.52193	3.16971	2.57192	2.28092	3.17026	3.63043	2.16087	3.16136
0:04:20	2.19892	2.32457	2.86078	2.72231	2.93462	3.2376	1.67741	2.49413	2.66759	2.83581	3.15359	3.0557	2.47728	2.73813	3.43967	3.36851	3.55645	3.2069	2.6081	2.28952	3.14512	3.66164	2.16563	3.254
0:04:30	2.22691	2.32936	2.90811	2.74641	2.96552	3.24648	1.69506	2.55004	2.67286	2.89072	3.21096	3.10656	2.5208	2.76255	3.46395	3.39592	3.60219	3.23461	2.61185	2.30154	3.17639	3.67437	2.12974	3.23079
0:04:40	2.27228	2.32409	2.95134	2.72631	2.97916	3.27385	1.72212	2.55859	2.67416	2.87682	3.24533	3.15535	2.52273	2.80904	3.49196	3.39484	3.58545	3.24884	2.65408	2.34606	3.19766	3.71363	2.15661	3.26419
0:04:50	2.30678	2.33204	2.97193	2.76663	2.99294	3.28667	1.73592	2.62228	2.71913	2.89072	3.26052	3.17602	2.54057	2.82375	3.56223	3.39681	3.65386	3.23597	2.64234	2.35833	3.23141	3.74889	2.17822	3.30875
0:05:00	2.30606	2.3496	3.02972	2.75846	3.01414	3.258	1.7522	2.61691	2.72356	2.88431	3.25185	3.22269	2.54487	2.83324	3.58688	3.42717	3.63329	3.24257	2.68194	2.3599	3.25635	3.76174	2.20446	3.36149
Figure 3-figure supplement 1E. Dextran nuclear intensity (vs. time 0). Each value represents the mean of 20-30 cells
Time (sec)	Untreated						GP10 100 µM						GA10 100 µM						PA10 100 µM
	1	2	3	4	5	6	1	2	3	4	5	6	1	2	3	4	5	6	1	2	3	4	5	6
0:00:10 sec	1	1	1	1	1		1	1	1	1	1	1	1	1	1	1	1	1	1	1	1	1	1	1
0:00:20	1.19498	1.15848	1.16529	1.17274	1.1139		1.11674	1.12046	1.09053	1.16053	1.14268	1.13926	1.17431	1.15842	1.12057	1.14954	1.10369	1.06525	1.16966	1.16772	1.2113	1.1192	1.14531	1.09994
0:00:30	1.31783	1.27141	1.27429	1.29205	1.19222		1.19585	1.21092	1.16234	1.3459	1.2312	1.24442	1.29824	1.2722	1.23371	1.2796	1.18054	1.17886	1.27547	1.28533	1.31325	1.19866	1.2502	1.16438
0:00:40	1.41307	1.36544	1.35796	1.37855	1.28975		1.27059	1.28917	1.24124	1.49149	1.30727	1.34079	1.39244	1.36225	1.29738	1.39651	1.24374	1.2678	1.36857	1.37928	1.41315	1.25885	1.33112	1.22402
0:00:50	1.48887	1.45457	1.44018	1.47707	1.35866		1.32736	1.35412	1.31738	1.58695	1.36728	1.41102	1.46942	1.44694	1.37719	1.47227	1.29806	1.34057	1.44329	1.45874	1.48211	1.30924	1.39775	1.26507
0:01:00	1.56035	1.52657	1.55233	1.55765	1.41906		1.38429	1.40076	1.38208	1.66183	1.42271	1.47992	1.52882	1.51242	1.4187	1.52895	1.34003	1.40475	1.51078	1.52765	1.56035	1.3584	1.45334	1.30519
0:01:10	1.61105	1.60227	1.67481	1.62442	1.47397		1.4321	1.44603	1.43902	1.71633	1.46542	1.53651	1.58556	1.57696	1.4659	1.58197	1.39086	1.46637	1.56775	1.58886	1.62142	1.41203	1.51501	1.34223
0:01:20	1.66652	1.6691	1.77443	1.67356	1.52356		1.48006	1.4952	1.49174	1.75694	1.51194	1.59415	1.642	1.62739	1.50299	1.62968	1.43347	1.51672	1.62199	1.64257	1.68817	1.46793	1.5596	1.37862
0:01:30	1.71023	1.73263	1.84687	1.71954	1.60103		1.52195	1.53499	1.53293	1.79697	1.54994	1.64178	1.68567	1.67664	1.54691	1.68175	1.48108	1.55648	1.66874	1.68837	1.73394	1.51875	1.60016	1.41654
0:01:40	1.75674	1.78658	1.90932	1.75824	1.65114		1.56865	1.5721	1.56779	1.81706	1.58658	1.68263	1.72306	1.72849	1.59591	1.73245	1.51267	1.59322	1.71583	1.73167	1.76972	1.56174	1.6408	1.45506
0:01:50	1.80081	1.84426	1.95916	1.78987	1.68452		1.62017	1.61732	1.59829	1.84994	1.63053	1.72058	1.76463	1.77196	1.62938	1.78029	1.54813	1.62848	1.76116	1.76631	1.80335	1.60812	1.67995	1.48102
0:02:00	1.84405	1.88673	1.98869	1.81969	1.71826		1.65129	1.65482	1.62916	1.86973	1.66742	1.76136	1.80032	1.82117	1.65569	1.8217	1.58194	1.65766	1.79709	1.80823	1.86192	1.64634	1.70945	1.51361
0:02:10	1.88481	1.93007	2.01628	1.84597	1.76767		1.68265	1.68097	1.66335	1.90156	1.70072	1.79636	1.83423	1.86161	1.68855	1.85947	1.60969	1.68735	1.84064	1.84829	1.88	1.67025	1.73448	1.53933
0:02:20	1.91909	1.95265	2.03479	1.87805	1.81547		1.69666	1.70084	1.68833	1.93433	1.7312	1.83389	1.87134	1.90449	1.72809	1.91073	1.63357	1.71811	1.87978	1.888	1.93724	1.70531	1.77265	1.56787
0:02:30	1.94566	1.9841	2.05163	1.91012	1.83953		1.70584	1.73091	1.70613	1.96174	1.7596	1.86078	1.90766	1.93896	1.75961	1.95286	1.66576	1.74666	1.91766	1.92644	1.97166	1.73169	1.79332	1.59757
0:02:40	1.98402	2.01423	2.06346	1.93652	1.85886		1.71367	1.74562	1.72548	1.99604	1.79154	1.89884	1.93487	1.98405	1.77926	1.98336	1.68981	1.77547	1.94688	1.96954	2.00355	1.75771	1.81946	1.62268
0:02:50	2.0136	2.05175	2.0808	1.95917	1.9073		1.71646	1.77094	1.73354	2.02793	1.81255	1.92968	1.96613	2.02032	1.79917	2.0169	1.71118	1.79695	1.98863	2.01211	2.03523	1.78451	1.83863	1.64874
0:03:00	2.03277	2.07324	2.08205	1.97626	1.93843		1.72526	1.78214	1.75316	2.03856	1.83331	1.96195	1.9987	2.05642	1.82251	2.04864	1.74316	1.81668	2.01009	2.04687	2.0609	1.80505	1.86166	1.67311
0:03:10	2.05598	2.09803	2.09093	2.00257	1.98912		1.73823	1.80146	1.77533	2.08469	1.84925	2.00708	2.02175	2.0995	1.83762	2.08205	1.76857	1.8328	2.04253	2.0834	2.08556	1.82928	1.88447	1.69258
0:03:20	2.08166	2.11515	2.10265	2.02513	2.01723		1.75667	1.81178	1.77941	2.09844	1.88059	2.02974	2.05412	2.13653	1.86855	2.12038	1.79206	1.85152	2.07021	2.11945	2.10362	1.85253	1.89963	1.71575
0:03:30	2.10456	2.14806	2.11063	2.03357	2.01646		1.76397	1.83892	1.78363	2.11854	1.88884	2.05215	2.07449	2.17638	1.89223	2.14479	1.81816	1.87514	2.09578	2.15855	2.13153	1.86384	1.91482	1.73438
0:03:40	2.13034	2.15712	2.11586	2.0681	2.05635		1.77592	1.86462	1.79671	2.12699	1.9015	2.07773	2.10238	2.21865	1.91227	2.15566	1.84176	1.90496	2.12815	2.1889	2.161	1.87905	1.92422	1.74285
0:03:50	2.15147	2.18113	2.11833	2.07914	2.06846		1.79505	1.88668	1.80769	2.14471	1.90337	2.10469	2.12412	2.25928	1.92307	2.16949	1.85496	1.93082	2.15295	2.22268	2.17698	1.89151	1.94217	1.7482
0:04:00	2.17556	2.19714	2.1286	2.08919	2.08586		1.80313	1.91184	1.80955	2.15254	1.91165	2.11844	2.1402	2.27686	1.94581	2.1807	1.86843	1.94631	2.17285	2.25361	2.2018	1.89622	1.95453	1.75862
0:04:10	2.18752	2.22027	2.13556	2.10011	2.10741		1.81506	1.929	1.81416	2.16477	1.91682	2.13451	2.15822	2.2975	1.96437	2.18268	1.87794	1.96164	2.19776	2.29381	2.23058	1.90477	1.96626	1.76524
0:04:20	2.20997	2.23074	2.13863	2.09964	2.11702		1.82054	1.95004	1.82173	2.17637	1.93061	2.15412	2.1832	2.3182	1.98064	2.19628	1.89314	1.98109	2.22042	2.31931	2.25657	1.91506	1.97126	1.77897
0:04:30	2.23616	2.23574	2.15243	2.11082	2.1225		1.84075	1.9703	1.82872	2.17474	1.94199	2.15798	2.19966	2.32976	1.97789	2.22866	1.90273	1.99098	2.24181	2.34302	2.27921	1.92445	1.98256	1.78698
0:04:40	2.25894	2.26014	2.15404	2.13167	2.13097		1.85075	1.98888	1.83138	2.18035	1.94893	2.18276	2.21553	2.34784	2.00695	2.21776	1.91341	1.98723	2.26218	2.37481	2.29498	1.93619	1.99475	1.8013
0:04:50	2.28377	2.28251	2.15576	2.1419	2.14418		1.86213	2.00091	1.82577	2.1763	1.96718	2.19958	2.23899	2.35559	2.03132	2.22344	1.9291	1.98281	2.2661	2.39143	2.32918	1.95562	1.99963	1.8151
0:05:00	2.29225	2.29341	2.16553	2.15579	2.15081		1.87923	2.01159	1.82653	2.17293	1.97973	2.21547	2.25628	2.3749	2.04534	2.23435	1.93648	1.98087	2.27924	2.41906	2.37718	1.96484	2.00767	1.82867

## Sheet: Figure 3-figure suppl 2
Figure 3-figure supplement 2B. Rim to background ratio (each value represents the mean of 5 intensity profiles/bead)
	DPR alone																				DPR + ImpB																					Two-way ANOVA
GP Nup116 F-->A	1.38093	1.51218	1.64022	1.3613	1.34821	1.46064	1.39578	1.30884	1.37835	1.33523	1.38385	1.42533	1.43244	1.33372	1.38329	1.51075	1.3997	1.48999	1.40756	1.34422	1.37503	1.42021	1.41452	1.3917	1.45146	1.29923	1.49226	1.39325	1.35447	1.3403	1.37691	1.41127	1.71697	1.3662	1.45694	1.43554	1.4075	1.45535	1.3639	1.35554		Alpha	0.05
GA	1.39595	1.37278	1.35313	1.43669	1.34978	1.30418	1.36863	1.36677	1.42288	1.32547	1.39592	1.40079	1.33044	1.3647	1.42842	1.36884	1.39637	1.39625	1.33137	1.37439	1.4481	1.41733	1.36674	1.32064	1.36153	1.34509	1.36987	1.32708	1.33658	1.40521	1.26685	1.41672	1.40645	1.36211	1.38216	1.35924	1.36312	1.29199	1.42098	1.35512
GR	3.52719	3.46626	3.46225	3.76531	3.97859	3.42619	3.70653	3.70075	3.67633	4.20977	3.19867	2.92923	3.67604	2.99706	3.37784	2.88308	3.04378	4.66461	4.1759	3.16077	2.39535	2.51339	3.16078	2.24679	3.04951	2.56516	2.59942	2.57785	3.0537	2.69605	2.86064	3.64045	3.18281	2.32705	2.56373	3.30569	2.6955	2.36004	2.86654	2.39718		Source of Variation	% of total variation	P value	Summary
PR	4.49607	3.1301	3.27457	2.13092	3.08444	2.68046	2.2663	2.83186	2.5124	3.58513	2.81658	2.73168	2.29227	2.80754	2.5956	3.2631	2.6022	3.37561	2.95665	2.69352	2.14286	2.2698	2.03425	2.54459	2.57619	2.25036	2.0792	2.0935	2.2034	2.23375	2.21673	2.16962	1.96608	2.06427	2.46813	2.11024	2.08262	4.7047	2.16279	2.34073		Interaction	6.021	<0.0001	****
PA	1.37361	1.38231	1.30113	1.40845	1.41232	1.42539	1.41099	1.34929	1.3746	1.45988	1.30109	1.31901	1.45232	1.41996	1.33983	1.34497	1.39892	1.3849	1.51414	1.38526	1.48929	1.46326	1.37328	1.49468	1.33176	1.40871	1.36288	1.39406	1.40359	1.3748	1.39418	1.36252	1.38876	1.45901	1.42714	1.4634	1.46628	1.35534	1.42045	1.35104		Row Factor	72.82	<0.0001	****
																																										Column Factor	0.4256	<0.0001	****
GP Nup 116	1.41844	1.65186	1.39354	1.53029	1.55209	1.39827	1.33045	1.37901	1.98	1.34377	1.3587	1.27644	1.40405	1.30923	1.5028	1.43209	1.32201	1.30996	1.45867	1.43022	1.41721	1.3229	1.37337	1.36185	1.41191	1.57732	1.33441	1.35661	1.3409	1.36226	1.388	1.37262	1.5174	1.40865	1.28121	1.43423	1.51835	1.38976	1.31498	1.40685
GA	1.35123	1.31428	1.36817	1.39357	1.30895	1.35278	1.35403	1.30964	1.36201	1.37333	1.36379	1.35229	1.38822	1.36721	1.53964	1.42903	1.32498	1.3423	1.39667	1.34148	1.39433	1.41012	1.40168	1.2682	1.44816	1.3943	1.40515	1.38699	1.41643	1.38888	1.51552	1.34162	1.42865	1.42134	1.35382	1.43983	1.33049	1.42831	1.32993	1.37408		ANOVA table	SS (Type III)	DF	MS	F (DFn, DFd)	P value
GR	2.59577	4.21575	3.86438	4.24264	4.728	3.82483	3.30367	4.2839	4.4033	4.22232	4.09121	3.60796	3.39316	2.90987	3.06081	4.73131	2.76109	3.33951	3.13319	3.86109	2.80909	3.04091	3.11231	2.95506	2.90996	3.49991	4.42587	3.4904	4.42375	2.39785	4.11653	2.72533	3.55749	4.3539	3.48516	3.58339	3.83305	2.53309	3.13644	3.34015		Interaction	168.4	24	7.015	F (24, 1005) = 11.89	P<0.0001
PR	2.26659	2.38175	2.34239	3.31735	2.6955	2.54571	2.77634	2.61233	2.78402	2.28694	2.11422	3.17653	2.80303	2.6268	2.60008	2.70131	1.89127	2.55608	2.06291	3.14171	2.62137	2.16989	2.47477	2.82927	3.34873	2.74986	2.14647	2.41984	2.71194	4.28222	2.28485	2.95895	3.28298	3.12285	2.48607	2.72192	2.48617	3.48995	2.50017	2.59716		Row Factor	2036	24	84.85	F (24, 1005) = 143.8	P<0.0001
PA	1.38887	1.34111	1.36384	1.27777	1.3379	1.45082	1.42092	1.36217	1.38902	1.32105	1.46943	1.41524	1.39985	1.42669	1.35282	1.42237	1.32805	1.31037	1.33625	1.43857	1.45563	1.41676	1.40368	1.37694	1.43762	1.55398	1.42479	1.43042	1.39959	1.50756	1.3841	1.37258	1.39763	1.46981	1.36136	1.39812	1.66958	1.40637	1.41473	1.37632		Column Factor	11.9	1	11.9	F (1, 1005) = 20.17	P<0.0001
																																										Residual	593	1005	0.5901
GP Nup 100 1-307	1.41153	1.57663	1.36687	1.4087	1.46808	1.34048	1.34022	1.85685	1.98994	2.46974	1.64053	1.40844	1.83232	1.54929	1.35057	2.45717	1.29305	1.44515	1.67642	1.47878	1.40603	1.35921	2.21279	1.67734	1.51166	1.25244	1.35935	1.45608	1.30049	1.45593	1.40815	1.50935	1.96617	1.3311	1.90355	3.2575	2.40881	1.83384	1.54802	1.6475		Tukey's multiple comparisons test (all pairwise comparisons were made, only relevant biological comparisons are shown)
GA	1.64042	1.28099	1.46306	1.35231	1.95694	1.84557	1.3405	2.34493	2.03279	1.31451	1.34086	1.32688	1.77052	1.35648	1.32442	1.33806	1.38313	1.29819	1.23345	1.37948	1.46574	2.04592	2.18974	1.45142	1.39008	1.42767	2.4097	1.44395	1.35872	1.41803	1.4592	1.41926	1.46842	1.32206	1.42165	1.4246	1.48677	1.43529	1.358	1.34823		GR		Adjusted P Value	Summary		PR	Adjusted P Value	Summary
GR	3.95473	3.48511	5.65368	5.31297	10.8943	4.70354	5.61498	6.48813	4.62722	3.71452	5.01497	3.80775	4.88757	4.53372	3.39541	6.0972	3.95541	4.25564	3.60026	3.61235	6.88269	3.81327	5.43734	4.60201	3.62431	3.92995	4.78892	4.35755	3.37853	6.02029	3.01755	5.15426	3.50536	6.33263	4.4162	3.46827	3.22111	3.9137	5.83442	5.85331
PR	4.11566	4.42055	7.45267	5.75861	3.65747	4.50385	10.2107	3.01903	7.37777	5.12618	3.96675	4.32491	5.25804	8.50482	7.17908	3.31347	3.87728	3.13981	5.26143	3.48948	3.5988	5.05034	4.32753	8.48888	6.92173	6.07483	4.20487	3.95031	3.35647	6.73763	4.5027	3.59218	6.41503	5.76882	2.86152	3.62168	6.87162	6.04778	5.06343	4.33511		GR 1027:DPR alone vs. GR 1027:DPR + Impß		0.3842	ns		PR 1027:DPR alone vs. PR 1027:DPR + Impß	0.9779	ns
PA	2.47375	1.56487	1.77189	1.93112	2.11577	1.41812	1.71674	1.85937	2.02311	1.75638	1.46017	1.39575	3.26257	1.46778	3.2831	1.67419	2.32629	1.33701	1.40587	1.77956	1.4985	1.33043	1.35837	1.49614	1.82033	1.45617	1.45222	1.5963	1.37843	1.98687	1.45008	1.43478	1.3646	1.35472	1.4035	2.26727	1.33574	1.44371	1.49658	1.49839
																																										GR 1027:DPR alone vs. GR 1026:DPR alone		>0.9999	ns		PR 1027:DPR alone vs. PR 1026:DPR alone	>0.9999	ns
GP Nup 100 1-610	1.27833	1.4348	1.30694	1.41824	1.58192	1.41292	1.62465	1.31251	1.58801	1.81161	1.52105	1.75576	1.68484	1.44261	1.36965	1.32558	1.37671	1.58004	1.56059	1.59975	1.60351	1.3846	2.16486	1.48939	1.52462	1.56662	1.6576	1.36803	1.40535	1.27413	1.48083	1.88887	1.72167	2.03843	1.42281	1.87146	1.34427	1.40129	1.67095	1.84365		GR 1027:DPR alone vs. GR 1028:DPR alone		<0.0001	****		PR 1027:DPR alone vs. PR 1028:DPR alone	<0.0001	####
GA	1.36891	1.34579	1.35516	1.38782	1.42036	1.36067	1.37302	1.39742	1.33228	1.34931	1.28254	1.31487	1.36303	1.4958	1.40993	1.40938	1.33903	1.39335	1.42017		1.262	1.38677	1.32303	1.31485	1.33672	1.38845	1.31976	1.44104	1.33106	1.33217	1.45287	1.37745	1.40779	1.36568	1.26823	1.30101	1.3657	1.3461	1.31286	1.36648		GR 1027:DPR alone vs. GR 1029:DPR alone		0.2191	ns		PR 1027:DPR alone vs. PR 1029:DPR alone	0.0109	#
GR	4.78932	6.14929	4.27061	3.87189	4.54779	4.31723	3.12805	5.64705	4.33614	5.38508	3.80209	3.32761	3.81079	3.49217	3.47208	6.22501	6.12229	3.5682	4.06802	3.82725	6.12963	5.66387	5.04218	3.70645	5.52749	4.47327	5.74045	4.72638	5.05586	5.20088	6.80859	4.44211	5.3286	5.2637	4.57934	5.33048	4.96859	4.49989	4.73879	6.03214		GR 1027:DPR alone vs. GR 1609:DPR alone		0.0785	ns		PR 1027:DPR alone vs. PR 1609:DPR alone	0.1343	ns
PR	3.54497	4.31935	3.38753	4.46249	7.49379	4.28565	4.83993	3.37978	3.09329	4.33621	3.99197	3.48279	3.54198	2.38366	4.85262	3.6914	3.77436	2.97493	4.27399	3.41178	6.82593	5.77321	5.04931	7.82189	6.75211	6.10702	6.80148	7.6059	6.2259	6.26732	5.62005	10.7544	6.1184	4.70881	7.75862	6.52469	5.45627	8.29757	5.39065	5.38107
PA	1.43652	1.46264	1.54726	1.41721	1.74616	1.52324	2.00405	1.50005	1.48723	1.5929	1.49199	2.35156	1.86612	1.64709	1.55257	1.38158	1.39577	1.42984	1.48266	1.36089	1.47525	1.4985	1.80598	1.37251	1.40843	1.33031	1.63158	1.435	1.38976	1.30433	1.36003	1.28986	1.34584	1.59322	1.33664	1.53343	1.3992	1.43982	1.47647	1.44668		GR 1027:DPR + Impß vs. GR 1026:DPR + Impß		0.9022	ns		PR 1027:DPR + Impß vs. PR 1026:DPR + Impß	0.9999	ns
																																										GR 1027:DPR + Impß vs. GR 1028:DPR + Impß		<0.0001	****		PR 1027:DPR + Impß vs. PR 1028:DPR + Impß	<0.0001	####
GP Nsp1	1.62739	1.38625	1.32949	1.25656	1.85618	1.37388	1.40106	1.36416	1.33265	1.54874	1.34969	1.31279	1.35801	2.37034	1.35318	1.48839	1.34338	1.41228	1.34536	1.37845	1.42812	3.39817	1.66227	2.28697	2.82333	1.78849	1.4454	1.60083	2.35375	1.35376	1.47965	1.62142	1.45206	1.52412	2.2847	3.40954	1.40643	1.33792	1.68137	1.48742		GR 1027:DPR + Impß vs. GR 1029:DPR + Impß		<0.0001	****		PR 1027:DPR + Impß vs. PR 1029:DPR + Impß	<0.0001	####
GA	1.42242	1.38522	1.3928	1.48752	1.32519	1.37251	1.35353	1.33215	1.39583	1.35282	1.30641	1.2924	1.3297	1.45812	1.33179	1.44391	1.35428	1.49502	1.35588	1.37859	1.37074	1.38931	1.41675	1.28687	1.50292	1.48683	1.41253	1.39542	1.45889	1.38523	1.35312	1.33261	1.37711	1.44601	1.3957	1.35715	1.40875	1.37846	1.43976			GR 1027:DPR + Impß vs. GR 1609:DPR + Impß		>0.9999	ns		PR 1027:DPR + Impß vs. PR 1609:DPR + Impß	<0.0001	####
GR	2.24143	2.90858	2.22122	2.50917	2.98715	2.75509	2.44636	2.23924	2.1035	2.61174	2.80894	2.56114	2.33504	2.34024	2.61851	2.86526	2.5833	2.31414	3.49756	3.26197	3.65971	2.96171	1.53731	3.32556	2.6445	3.02416	2.79234	2.3089	3.44594	3.2031	3.297	2.84148	3.06865	2.52322	3.57264	3.91281	2.99176	3.69261	3.82868	3.06951
PR	2.57696	1.98044	3.67977	1.98056	3.45046	6.96894	3.00066	4.13725	3.72049	2.2493	8.07443	4.61089	2.46917	3.16529	1.83954	2.76689	6.64909	2.00162	5.0776	6.87838	7.37436	5.66296	4.8463	3.11926	6.27958	7.74569	11.5368	2.94702	6.79326	3.55349	7.29924	7.88753	4.4691	9.64507	12.1149	5.25862	5.22728	5.01554	11.6643			GR 1027:DPR alone vs. GR 1027:DPR + Impß		0.3842	ns		PR 1027:DPR alone vs. PR 1027:DPR + Impß	0.9779	ns
PA	1.43661	1.36634	1.41367	1.52203	1.47608	1.35373	1.36146	1.64247	1.36528	2.41964	1.34993	1.37925	1.43645	1.35158	1.43719	1.37175	1.7527	1.42918	1.34477	1.40801	1.38416	1.33323	1.36535	2.61333	1.36494	1.54387	3.74798	1.67752	3.33519	1.61866	1.39256	1.68956	1.45397	1.90997	1.36121	1.37013	1.39428	2.10744	1.41066	1.37948		GR 1026:DPR alone vs. GR 1026:DPR + Impß		>0.9999	ns		PR 1026:DPR alone vs. PR 1026:DPR + Impß	>0.9999	ns
																																										GR 1028:DPR alone vs. GR 1028:DPR + Impß		>0.9999	ns		PR 1028:DPR alone vs. PR 1028:DPR + Impß	>0.9999	ns
																																										GR 1029:DPR alone vs. GR 1029:DPR + Impß		0.5352	ns		PR 1029:DPR alone vs. PR 1029:DPR + Impß	<0.0001	####
																																										GR 1609:DPR alone vs. GR 1609:DPR + Impß		0.9994	ns		PR 1609:DPR alone vs. PR 1609:DPR + Impß	<0.0001	####
