# Supplementary material for: C9orf72 arginine-rich dipeptide repeat proteins disrupt karyopherin-mediated nuclear import
Source: eLife. 2020 Mar 2;9:e51685. doi: 10.7554/eLife.51685 (PMC7051184; doi:10.7554/eLife.51685)
Supplement: Figure 4—source data 1. [file elife-51685-fig4-data1.xlsx]

## Sheet: Figure 4
Figure 4D. % control (band densities all normalized to untreated HEK cells on the same membrane)
Pellet								Supernatant
	HEK		GR		PR				HEK		GR		PR
	Blot 1	Blot 2	Blot 1	Blot 2	Blot 1	Blot 2			Blot 1	Blot 2	Blot 1	Blot 2	Blot 1	Blot 2
Tnpo1	100	100	291.62	442.05	258.14	476.32		Tnpo1	100	100	81.88	67.75	76.87	64.98
ImpB	100	100	1064.76	423.77	818.26	483.79		ImpB	100	100	82.99	93.22	89.25	76.97
ImpA	100	100	193.25	205.36	169.98	198.65		ImpA	100	100	76.58	87.36	78.07	90.03
RanGAP1	100	100	1022.6	573.74	413.6	481.72		RanGAP1	100	100	60.98	68.66	76.62	84.17
RCC1	100	100	44.76	154.69	27.73	109.01		RCC1	100	100	103.36	123.56	103.67	124.4
Ran	100	100	340.62	461.64	101.82	132.85		Ran	100	100	119.46	102.77	104.73	105.68
Pellet								Supernatant
	HEK		GR		PR				HEK		GR		PR
	Blot 1	Blot 2	Blot 1	Blot 2	Blot 1	Blot 2			Blot 1	Blot 2	Blot 1	Blot 2	Blot 1	Blot 2
Nup133	100	100	281.41	251.55	156.48	194.32		Nup133	100	100	45.49	41.36	45.61	40.15
Nup98	100	100	119.04	141.56	109.87	150.1		Nup98	100	100	59.76	58.65	57.17	67.52
Nup62	100	100	233.3	207.34	204.02	227.09		Nup62	100	100	189.89	93.12	154.29	111.03
Nup54	100		162.44		143.42			Nup54	100		87		96.84

## Sheet: Figure 4-figure suppl 2
Figure 4-supplemental figure 2B. % control (band densities all normalized to untreated HEK cells on the same membrane)
Pellet								Supernatant
	HEK		GR		PR				HEK		GR		PR
	Blot 1	Blot 2	Blot 1	Blot 2	Blot 1	Blot 2			Blot 1	Blot 2	Blot 1	Blot 2	Blot 1	Blot 2
Matrin-3	100	100	270.69	218.87	407.75	159.05		Matrin-3	100	100	29.82	41.86	25.9	42.9
FUS	100	100	51.79	25.66	65.79	35.19		FUS	100	100	96.96	123.42	99.5	123.21
TDP43	100	100	671.31	218.36	424.25	185.64		TDP43	100	100	72.64	58.59	54.8	45.88
hnRNPA1	100	100	289.84	369.62	165.23	367.05		hnRNPA1	100	100	84.74	67.29	61.73	58.62
hnRNPA2/B1	100	100	384.03	231.37	426.44	309.09		hnRNPA2/B1	100	100	98.68	57.32	53.48	56.67
DDX3X	100	100	116.89	149.1	156.62	221.36		DDX3X	100	100	20.45	11.79	10.85	1.8
RPS6	100	100	304.8	380.9	219	275		RPS6	100	100	9.4	10.9	3.7	6.4
