# Supplementary material for: C9orf72 arginine-rich dipeptide repeat proteins disrupt karyopherin-mediated nuclear import
Source: eLife. 2020 Mar 2;9:e51685. doi: 10.7554/eLife.51685 (PMC7051184; doi:10.7554/eLife.51685)
Supplement: Figure 5—source data 1. [file elife-51685-fig5-data1.xlsx]

## Sheet: Figure 5
Data
Figure 5A. Normalized Rango N/C ratio
	Untr	Untr + RNA 20µg	GR-100	GR-100 RNA 5	GR-100 RNA 10	GR-100 RNA 20	GR-100 RNA 20+RNase	PR 100	PR-100 RNA 5	PR-100 RNA 10	PR-100 RNA 20	PR-100 RNA 20+RNase
plate 1	100	110.6	40.7	87.83	106.45	100.5	62.91	26.3	29.73	22.44	101.2	20.62
2	100	103.62	68.5	95.25	110.6	116.7	67.44	30.2	30.87	41.91	82.2	21.44
3	100	92.15	77.4	61.4	72.3	117.5	52.67	12.7	40.34	50.12	97.7	41.83
4	100		16.83			88.64		19.88			61.4
5	100		20.75			110.29		18.82			64.42
6	100		34.29			132.9		49.46			94.58
Figure 5C. Normalized Rango N/C ratio
		+Aggregates				-Aggregates				+Aggregates				-Aggregates
	Untr	GR-50	GR-50+RNA	GR-100	GR-100+RNA	GR-50	GR-50+RNA	GR-100	GR-100+RNA	PR-50	PR-50+RNA	PR-100	PR-100+RNA	PR-50	PR-50 + RNA	PR-100	PR-100 + RNA
plate 1	100	81.1	96.4	40.7	100.5	107.4	111.7	103.1	85.7	70.4	93	26.3	101.2	47.5	104.4	20.7	116.2
2	100	105.7	108.6	68.5	116.7	133.2	116	98	95.9	67.1	99.2	30.2	82.2	57.2	103.7	29.3	90.1
3	100	95.2	104.1	77.4	117.5	109.2	123.3	105.1	114.6	46.9	89.1	12.7	97.7	47.2	92.5	17.3	78.9
Figure 5F. Normalized Rango N/C ratio
		Lysate preincubation				Nuclei preincubation
	Untr	GR10-100µM	PR10-100µM	GR20-20µM	PR20-20µM	GR10-100µM	PR10-100µM	GR20-20µM	PR20-20µM
plate 1	100	16.61	23.07	99.52	36.68	85.06	81.25	108.83	94.62
2	100	26.29	29.61	105.02	58.74	82.46	85.48	97.22	99.76
3	100	16.83	19.88	80	32	105.78	89.01	80.78	88.97
4	100	20.75	18.82	109	90.8	114.5	63.99	93.59	98.21
5	100	34.29	49.46	117.8	87.3
Statistical analysis
Figure 5A
One-way ANOVA
F (11, 36) = 16.96		P<0.0001
Dunnett's multiple comparisons test
			Adjusted P	Summary
Untr vs. Untr + RNA			0.9998	ns
Untr vs. GR-100			0.0001	***
Untr vs. GR-100 RNA 5			0.6511	ns
Untr vs. GR-100 RNA 10			0.9996	ns
Untr vs. GR-100 RNA 20			0.9221	ns
Untr vs. GR-100 RNA 20 Rnase			0.0361	*
Untr vs. PR 100			<0.0001	****
Untr vs. PR-100 RNA 5			0.0001	***
Untr vs. PR-100 RNA 10			0.0003	***
Untr vs. PR-100 RNA 20			0.6262	ns
Untr vs. PR-100 RNA 20 RNase			<0.0001	****
Figure 5C
One-way ANOVA
F (17, 36) = 25.20		P<0.0001
Dunnett's multiple comparisons test
			Adjusted P	Summary
Untr vs. GR-50			0.999	ns
Untr vs. GR-50+RNA			0.9996	ns
Untr vs. GR-100			0.002	**
Untr vs. GR-100+RNA			0.8626	ns
Untr vs. GR-50			0.469	ns
Untr vs. GR-50+RNA			0.439	ns
Untr vs. GR-100			0.9997	ns
Untr vs. GR-100+RNA			0.9998	ns
Untr vs. PR-50			0.0015	**
Untr vs. PR-50+RNA			0.9989	ns
Untr vs. PR-100			<0.0001	****
Untr vs. PR-100+RNA			0.996	ns
Untr vs. PR-50			<0.0001	****
Untr vs. PR-50 + RNA			>0.9999	ns
Untr vs. PR-100			<0.0001	****
Untr vs. PR-100 + RNA			0.9992	ns
Figure 5F
One-way ANOVA
F (8, 31) = 22.89		P<0.0001
Dunnett's multiple comparisons test
			Adjusted P	Summary
Untr vs. GR10-100µM (lysate)			<0.0001	****
Untr vs. PR10-100µM (lysate)			<0.0001	****
Untr vs. GR20-20µM (lysate)			0.9997	ns
Untr vs. PR20-20µM (lysate)			0.002	**
Untr vs. GR10-100µM (nuclei)			0.9996	ns
Untr vs. PR10-100µM (nuclei)			0.2513	ns
Untr vs. GR20-20µM (nuclei)			0.9971	ns
Untr vs. PR20-20µM (nuclei)			0.9974	ns

## Sheet: Figure 5-figure suppl 1
Figure 5-supplemental figure 1A. Normalized Rango N/C ratio
	Untr	IPZ	HD 1 mM	HD 10 mM	HD 100 mM	HD 200 mM	HD 400 mM
plate 1	100	39.6	111.6	106.7	104.9	90.7	34.2
2	100	39.7	94.3	101.5	101.6	100	24.2
Figure 5-supplemental figure 1B. Normalized Rango N/C ratio
	Untr	IPZ	ImpB 10nM	ImpB 100nM	ImpB 1µM	ImpB 2µM	ImpB 4µM
plate 1	100	39.6	90.5	58.2	7.4	5.1	4.9
2	100	39.7	103.7	50.1	6.1	6	6.1
Figure 5-supplemental figure 1C. Normalized Rango N/C ratio
				+PR 25 µM
	-Lysate/Energy	Untr	PR 25 µM	HD 10 mM	HD 100 mM	HD 200 mM	HD 400 mM	ImpB 1uM	ImpB 2uM	ImpB 5uM	ImpB 10uM
plate 1	19.5	100	68.8	66.4	53.9	35.4	14.4	18.2	16.8	14.6	14.2
2	17.2	100	71.8					11.3	10.2	9	9.7

## Sheet: Figure 5-figure suppl 3
Figure 5-figure suppl 3C. % untr control (band densities all normalized to untreated HEK cells on the same membrane)
Pellet
	TNPO1				ImpB				ImpA				RanGAP1				TDP43				Ran				Rps6				Rps25
	Untreated		RNA		Untreated		RNA		Untreated		RNA		Untreated		RNA		Untreated		RNA		Untreated		RNA		Untreated		RNA		Untreated		RNA
Blot	1	2	1	2	1	2	1	2	1	2	1	2	1	2	1	2	1	2	1	2	1	2	1	2	1	2	1	2	1	2	1	2
HEK	1	1	0.624498	0.793836	1	1	0.799557	0.865702	1	1	0.94643	0.966293	1	1	0.997261	1.31364	1	1	0.988894	1.08683	1	1	1.32678	1.9216	1	1	0.584633	0.757981	1	1	0.617665	0.521905
GR10	1.95106	2.12808	1.41851	1.59152	2.45891	3.64346	1.63765	1.88994	1.90984	2.06861	1.76332	1.61099	3.8676	3.34569	3.34212	3.34312	1.73649	2.01408	1.64364	1.48566	2.0934	2.57015	2.34835	3.09781	4.23463	3.41299	4.33202	3.02432	2.8808	4.70224	2.95741	4.95874
PR10	2.84526	3.26125	1.62491	1.69578	2.31774	2.73941	1.76943	2.08789	1.7799	1.81791	1.71917	1.54074	2.8868	2.78187	3.09826	2.67446	1.80164	1.6543	1.55767	1.57991	1.7226	2.24017	2.01973	2.71012	4.55815	2.97044	3.96855	2.95145	3.06705	5.25422	3.02368	4.67962
GA10	1.07974	1.07456	0.843008	0.687867	0.901462	1.02117	0.900695	0.914234	1.06734	0.986991	0.9399	1.02253	0.873121	0.804373	0.93932	0.890974	1.16614	1.20532	1.12484	0.995115	0.791182	1.1678	1.29052	1.92763	1.1352	1.19872	0.458546	0.604841	0.84825	1.28353	0.485152	0.615707
Supernatant
	TNPO1				ImpB				ImpA				RanGAP1				TDP43				Ran				Rps6				Rps25
	Untreated		RNA		Untreated		RNA		Untreated		RNA		Untreated		RNA		Untreated		RNA		Untreated		RNA		Untreated		RNA		Untreated		RNA
Blot	1	2	1	2	1	2	1	2	1	2	1	2	1	2	1	2	1	2	1	2	1	2	1	2	1	2	1	2	1	2	1	2
HEK	1	1	0.934213	1.10758	1	1	1.09246	1.06753	1	1	0.908281	1.1025	1	1	1.09317	1.06091	1	1	1.02442	1.02017	1	1	0.948026	1.04018	1	1	1.17107	1.02956	1	1	1.2859	1.03184
GR10	0.514458	1.19996	0.792445	1.2657	0.986349	1.18941	0.931506	1.31865	0.870238	1.04482	0.777909	1.12282	0.674677	0.55214	0.727465	0.765518	0.387813	0.389049	0.718038	0.664048	1.1037	1.04483	1.13988	1.15116	0.029401	0.031151	0.07911	0.098113	0.016419	0.009611	0.077323	0.090359
PR10	0.657748	0.838723	0.750923	0.934705	0.763942	1.17486	0.956388	1.21543	0.797444	1.05291	0.857761	1.11128	0.625773	0.762492	1.15692	0.954802	0.412916	0.368299	0.712333	0.803069	1.05508	1.13601	1.14456	1.10299	0.023519	0.010925	0.083426	0.098325	0.008892	0.010559	0.121944	0.163006
GA10	0.662867	0.92008	0.646405	1.00292	0.891008	1.14576	0.787091	1.23357	0.828318	1.08205	0.838164	1.15582	1.31435	1.05301	0.832611	1.19175	0.863324	0.987252	0.880179	1.00775	1.1784	1.0567	1.16218	0.997581	0.900637	0.673227	0.646498	0.73011	1.12041	0.768425	1.2104	0.828455
